# Supplementary material
Source: ML conference proceedings conference paper supplement (https://openreview.net/forum?id=S0xrBMFihS)
Supplement: supplementary_material [file attachment]

## 471 A Proofs

### 472 A.1 Proof of Theorem 4.1

473 *Proof.* By the definition of  $\langle \nu_{\text{DE}}, f_{\text{DE}}^{(1)}, f_{\text{DE}}^{(2)} \rangle$ , we have:

$$\begin{aligned} \mathbb{E}_{\nu_{\text{DE}}} f_{\text{DE}}^{(1)}(\omega, \mathbf{x}) f_{\text{DE}}^{(2)}(\omega, \mathbf{y}) &= (2\pi)^{-\frac{d}{2}} D^2 \int_{\mathbb{R}^d} \exp\left(-\frac{1}{2}\|\omega\|^2 + 2\omega^\top \mathbf{A}\omega \right. \\ &\quad \left. + \omega^\top (\mathbf{B}^{(1)}\mathbf{x} + \mathbf{B}^{(2)}\mathbf{y}) + \mathbf{x}^\top \mathbf{C}^{(1)}\mathbf{x} + \mathbf{y}^\top \mathbf{C}^{(2)}\mathbf{y}\right) d\omega \\ &= (2\pi)^{-\frac{d}{2}} D^2 \exp\left(\mathbf{x}^\top \mathbf{C}^{(1)}\mathbf{x} + \mathbf{y}^\top \mathbf{C}^{(2)}\mathbf{y}\right) \\ &\quad \times \int_{\mathbb{R}^d} \exp\left(-\frac{1}{2}\omega^\top (\mathbf{I}_d - 4\mathbf{A})\omega + \omega^\top (\mathbf{B}^{(1)}\mathbf{x} + \mathbf{B}^{(2)}\mathbf{y})\right) d\omega. \end{aligned}$$

474 Since  $8\mathbf{A} \prec \mathbf{I}_d$ , we have  $4\mathbf{A} \prec 0.5\mathbf{I}_d \prec \mathbf{I}_d$ , meaning that  $\mathbf{I}_d - 4\mathbf{A}$  is positive definite and invertible.  
475 The following identity is straightforward to check:

$$\begin{aligned} -\frac{1}{2}\omega^\top (\mathbf{I}_d - 4\mathbf{A})\omega + \omega^\top (\mathbf{B}^{(1)}\mathbf{x} + \mathbf{B}^{(2)}\mathbf{y}) &= -\frac{1}{2}(\omega - \mu)^\top \Sigma^{-1}(\omega - \mu) + \frac{1}{2}\mu^\top \Sigma^{-1}\mu, \\ \Sigma &= (\mathbf{I}_d - 4\mathbf{A})^{-1}, \quad \mu = \Sigma(\mathbf{B}^{(1)}\mathbf{x} + \mathbf{B}^{(2)}\mathbf{y}). \end{aligned}$$

476 Therefore, we have:

$$\begin{aligned} \mathbb{E}_{\nu_{\text{DE}}} f_{\text{DE}}^{(1)}(\omega, \mathbf{x}) f_{\text{DE}}^{(2)}(\omega, \mathbf{y}) &= (2\pi)^{-d/2} D^2 \exp\left(\mathbf{x}^\top \mathbf{C}^{(1)}\mathbf{x} + \mathbf{y}^\top \mathbf{C}^{(2)}\mathbf{y} + \frac{1}{2}\mu^\top \Sigma^{-1}\mu\right) \\ &\quad \times \int_{\mathbb{R}^d} \exp\left(-\frac{1}{2}(\omega - \mu)^\top \Sigma^{-1}(\omega - \mu)\right) d\omega. \end{aligned}$$

477 Next, we use the fact that the integral of the multivariate Gaussian distribution with mean  $\mu$  and  
478 variance  $\Sigma$  is 1:

$$(2\pi)^{-d/2} \det(\Sigma)^{-1/2} \int_{\mathbb{R}^d} \exp\left(-\frac{1}{2}(\omega - \mu)^\top \Sigma^{-1}(\omega - \mu)\right) d\omega = 1.$$

479 From that we conclude:

$$\begin{aligned} \mathbb{E}_{\nu_{\text{DE}}} f_{\text{DE}}^{(1)}(\omega, \mathbf{x}) f_{\text{DE}}^{(2)}(\omega, \mathbf{y}) &= D^2 \det(\Sigma)^{1/2} \exp\left(\mathbf{x}^\top \mathbf{C}^{(1)}\mathbf{x} + \mathbf{y}^\top \mathbf{C}^{(2)}\mathbf{y} + \frac{1}{2}\mu^\top \Sigma^{-1}\mu\right) \\ &= D^2 \det(\mathbf{I}_d - 4\mathbf{A})^{-1/2} \exp\left(\mathbf{x}^\top \mathbf{C}^{(1)}\mathbf{x} + \mathbf{y}^\top \mathbf{C}^{(2)}\mathbf{y} \right. \\ &\quad \left. + \frac{1}{2}(\mathbf{B}^{(1)}\mathbf{x} + \mathbf{B}^{(2)}\mathbf{y})^\top (\mathbf{I}_d - 4\mathbf{A})^{-1}(\mathbf{B}^{(1)}\mathbf{x} + \mathbf{B}^{(2)}\mathbf{y})\right) \\ &= D^2 \det(\mathbf{I}_d - 4\mathbf{A})^{-1/2} \exp\left(\mathbf{x}^\top \left(\mathbf{C}^{(1)} + \frac{1}{2}(\mathbf{B}^{(1)})^\top (\mathbf{I}_d - 4\mathbf{A})^{-1}\mathbf{B}^{(1)}\right) \mathbf{x} \right. \\ &\quad \left. + \mathbf{y}^\top \left(\mathbf{C}^{(2)} + \frac{1}{2}(\mathbf{B}^{(2)})^\top (\mathbf{I}_d - 4\mathbf{A})^{-1}\mathbf{B}^{(2)}\right) \mathbf{y} + \mathbf{x}^\top (\mathbf{B}^{(1)})^\top (\mathbf{I}_d - 4\mathbf{A})^{-1}\mathbf{B}^{(2)}\mathbf{y}\right). \end{aligned}$$

480 Based on this expression, we conclude that, indeed,  $\mathbb{E}_{\nu_{\text{DE}}} f_{\text{DE}}^{(1)}(\omega, \mathbf{x}) f_{\text{DE}}^{(2)}(\omega, \mathbf{y}) = K^{(0)}(\mathbf{x}, \mathbf{y})$  for all  
481  $\mathbf{x}, \mathbf{y} \in \mathbb{R}^d$  if the conditions from theorem's statement are satisfied.

482 Next, we calculate expression for the variance. For any random variable  $Z$ ,  $\text{Var } Z = \mathbb{E}Z^2 - (\mathbb{E}Z)^2$ .

483 In particular, if  $Z = f_{\text{DE}}^{(1)}(\omega, \mathbf{x}) f_{\text{DE}}^{(2)}(\omega, \mathbf{y})$ ,  $\omega \sim \nu_{\text{DE}}$ , we get:

$$\begin{aligned} \text{Var}_{\nu_{\text{DE}}} f_{\text{DE}}^{(1)}(\omega, \mathbf{x}) f_{\text{DE}}^{(2)}(\omega, \mathbf{y}) &= \mathbb{E}_{\nu_{\text{DE}}} f_{\text{DE}}^{(1)}(\omega, \mathbf{x})^2 f_{\text{DE}}^{(2)}(\omega, \mathbf{y})^2 - \left(\mathbb{E}_{\nu_{\text{DE}}} f_{\text{DE}}^{(1)}(\omega, \mathbf{x}) f_{\text{DE}}^{(2)}(\omega, \mathbf{y})\right)^2 \\ &= \mathbb{E}_{\nu_{\text{DE}}} f_{\text{DE}}^{(1)}(\omega, \mathbf{x})^2 f_{\text{DE}}^{(2)}(\omega, \mathbf{y})^2 - K^{(0)}(\mathbf{x}, \mathbf{y})^2. \end{aligned}$$

484 We have:

$$\begin{aligned} \mathbb{E}_{\nu_{\text{DE}}} f_{\text{DE}}^{(1)}(\boldsymbol{\omega}, \mathbf{x})^2 f_{\text{DE}}^{(2)}(\boldsymbol{\omega}, \mathbf{y})^2 &= (2\pi)^{\frac{d}{2}} D^4 \int_{\mathbb{R}^d} \exp\left(-\frac{1}{2}\|\boldsymbol{\omega}\|^2 + 4\boldsymbol{\omega}^\top \mathbf{A}\boldsymbol{\omega} + 2\boldsymbol{\omega}^\top (\mathbf{B}^{(1)}\mathbf{x} + \mathbf{B}^{(2)}\mathbf{y})\right. \\ &\quad \left.+ 2\mathbf{x}^\top \mathbf{C}^{(1)}\mathbf{x} + 2\mathbf{y}^\top \mathbf{C}^{(2)}\mathbf{y}\right) d\boldsymbol{\omega} = (2\pi)^{\frac{d}{2}} D^4 \exp\left(2\mathbf{x}^\top \mathbf{C}^{(1)}\mathbf{x} + 2\mathbf{y}^\top \mathbf{C}^{(2)}\mathbf{y}\right) \\ &\quad \times \int_{\mathbb{R}^d} \exp\left(-\frac{1}{2}\boldsymbol{\omega}^\top (\mathbf{I}_d - 8\mathbf{A})\boldsymbol{\omega} + 2\boldsymbol{\omega}^\top (\mathbf{B}^{(1)}\mathbf{x} + \mathbf{B}^{(2)}\mathbf{y})\right) d\boldsymbol{\omega}. \end{aligned}$$

485 Evaluation of the integral above can be done in the same way as calculation of  
 486  $\mathbb{E}_{\nu_{\text{DE}}} f_{\text{DE}}^{(1)}(\boldsymbol{\omega}, \mathbf{x}) f_{\text{DE}}^{(2)}(\boldsymbol{\omega}, \mathbf{y})$ , noticing that  $\mathbf{I}_d - 8\mathbf{A}$  is positive definite and invertible. The result  
 487 is as follows:

$$\begin{aligned} \mathbb{E}_{\nu_{\text{DE}}} f_{\text{DE}}^{(1)}(\boldsymbol{\omega}, \mathbf{x})^2 f_{\text{DE}}^{(2)}(\boldsymbol{\omega}, \mathbf{y})^2 &= D^4 \det(\mathbf{I}_d - 8\mathbf{A})^{-1/2} \\ &\quad \times \exp\left(2\mathbf{x}^\top \left(\mathbf{C}^{(1)} + (\mathbf{B}^{(1)})^\top (\mathbf{I}_d - 8\mathbf{A})^{-1} \mathbf{B}^{(1)}\right) \mathbf{x}\right. \\ &\quad \left.+ 2\mathbf{y}^\top \left(\mathbf{C}^{(2)} + (\mathbf{B}^{(2)})^\top (\mathbf{I}_d - 8\mathbf{A})^{-1} \mathbf{B}^{(2)}\right) \mathbf{y} + 4\mathbf{x}^\top (\mathbf{B}^{(1)})^\top (\mathbf{I}_d - 8\mathbf{A})^{-1} \mathbf{B}^{(2)} \mathbf{y}\right). \end{aligned}$$

488 We conclude that the variance expression given in the theorem's statement is correct.  $\square$

## 489 A.2 Important lemma

490 Below, we prove an important lemma which is used in the subsequent proofs:

491 **Lemma A.1.** Consider a function  $f : (-\infty, \frac{1}{8})$  defined as

$$f(A) = \log(1 - 4A) - \frac{1}{2} \log(1 - 8A) + \frac{\phi}{1 - 8A} \quad (14)$$

492 where  $\phi \geq 0$ . Then, the minimum of  $f$  on  $(-\infty, \frac{1}{8})$  is achieved at

$$A^* = \frac{1}{16} \left(1 - 2\phi - \sqrt{(2\phi + 1)^2 + 8\phi}\right). \quad (15)$$

493 *Proof.* Set  $\gamma = (1 - 8A)^{-1} \in (0, +\infty)$ . Note that there is a one-to-one correspondence between  
 494  $\gamma \in (0, +\infty)$  and  $A \in (-\infty, \frac{1}{8})$ . Hence, we can substitute  $\gamma^{-1} = 1 - 8A$  and  $1 - 4A =$   
 495  $((1 - 8A) + 1)/2 = (\gamma^{-1} + 1)/2 = \frac{1+\gamma}{2\gamma}$  in (14) and equivalently perform minimization with respect  
 496 to  $\gamma$ :

$$\min_{\gamma \in (0, +\infty)} h(\gamma) = \log\left(\frac{\gamma + 1}{2\gamma}\right) + \frac{1}{2} \log \gamma + \phi \gamma = \log(\gamma + 1) - \frac{1}{2} \log \gamma - \log 2 + \phi \gamma.$$

497 For  $h(\cdot)$ 's derivative, we have:

$$h'(\gamma) = \phi + \frac{1}{\gamma + 1} - \frac{1}{2\gamma} = \phi + \frac{\gamma - 1}{2\gamma(\gamma + 1)} \quad (16)$$

$$= \frac{2\phi\gamma(\gamma + 1) + \gamma - 1}{2\gamma(\gamma + 1)} = \frac{2\phi\gamma^2 + (2\phi + 1)\gamma - 1}{2\gamma(\gamma + 1)}. \quad (17)$$

498 Based on (16), we see that  $h'(\gamma) \rightarrow -\infty$  as  $\gamma \rightarrow 0$  and  $h'(\gamma) > \phi \geq 0$  for all  $\gamma > 1$ . Hence,  
 499 we conclude that  $h(\cdot)$  is bounded from below on  $(0, +\infty)$  and the global minimum  $\gamma^*$  on  $(0, +\infty)$   
 500 exists and it is one of the points satisfying  $h'(\gamma^*) = 0$ . Hence, it's one of the positive roots of the  
 501 polynomial in numerator of (17).

502 If  $\phi = 0$ , there is a single root  $\gamma^* = 1$  of the polynomial in the numerator of (17), hence it is a global  
 503 minimum of  $h(\cdot)$ . If  $\phi > 0$ , then there are two roots of the polynomial in the numerator of (17):

$$\gamma_-^* = \frac{-(2\phi + 1) - \sqrt{(2\phi + 1)^2 + 8\phi}}{4\phi},$$

$$\gamma_+^* = \frac{-(2\phi + 1) + \sqrt{(2\phi + 1)^2 + 8\phi}}{4\phi}. \quad (18)$$

504 Note that, if  $\phi > 0$ , then  $2\phi + 1 > 0$  and  $(2\phi + 1)^2 + 8\phi \geq (2\phi + 1)^2$ . Hence,  $\gamma_-^* < 0$  and  
 505  $\gamma_+^* > 0$ . We conclude that  $\gamma^* = \gamma_+^*$  is the minimum of  $h(\cdot)$  on  $(0, +\infty)$ . We multiply numerator and  
 506 denominator of (18)'s right hand side by  $(2\phi + 1) + \sqrt{(2\phi + 1)^2 + 8\phi} > 0$ :

$$\gamma^* = \gamma_+^* = \frac{((2\phi + 1)^2 + 8\phi) - (2\phi + 1)^2}{4\phi \left( (2\phi + 1) + \sqrt{(2\phi + 1)^2 + 8\phi} \right)} = \frac{2}{2\phi + 1 + \sqrt{(2\phi + 1)^2 + 8\phi}}. \quad (19)$$

507 Note that the right hand side of (19) is equivalent to (18) when  $\phi > 0$  but also holds for the case  
 508 when  $\phi = 0$  (i.e. when  $\gamma^* = 1$ ). We conclude that  $f(\cdot)$  is minimized at  $\mathbf{A}^* = \frac{1}{8}(1 - (\gamma^*)^{-1})$  since  
 509  $\gamma^* = (1 - 8A^*)^{-1}$ . It's easy to see that (15) follows from (19) directly.  $\square$

### 510 A.3 Proof of Theorem 4.2

511 *Proof.* With  $\mathbf{A} = A\mathbf{I}_d$ , the conditions from Theorem 4.1 read as

$$8A < 1, \quad \frac{1}{1 - 4A}(\mathbf{B}^{(1)})^\top \mathbf{B}^{(2)} = \mathbf{I}_d, \quad \mathbf{C}^{(k)} = -\frac{1}{2(1 - 4A)}(\mathbf{B}^{(k)})^\top \mathbf{B}^{(k)}, \quad D = (1 - 4A)^{d/4} \quad (20)$$

512 for  $k \in \{1, 2\}$ . And the variance expression (9) for all  $\mathbf{x}, \mathbf{y} \in \mathbb{R}^d$  transforms into

$$\begin{aligned} \text{Var}_{\nu_{\text{ADE}}} f_{\text{ADE}}^{(1)}(\boldsymbol{\omega}, \mathbf{x}) f_{\text{ADE}}^{(2)}(\boldsymbol{\omega}, \mathbf{y}) &= D^4 (1 - 8A)^{-d/2} \exp \left( 2\mathbf{x}^\top \left( \mathbf{C}^{(1)} + \frac{1}{1 - 8A}(\mathbf{B}^{(1)})^\top \mathbf{B}^{(1)} \right) \mathbf{x} \right. \\ &\quad \left. + 2\mathbf{y}^\top \left( \mathbf{C}^{(2)} + \frac{1}{1 - 8A}(\mathbf{B}^{(2)})^\top \mathbf{B}^{(2)} \right) \mathbf{y} + \frac{4}{1 - 8A} \mathbf{x}^\top (\mathbf{B}^{(1)})^\top \mathbf{B}^{(2)} \mathbf{y} \right) - K^{(0)}(\mathbf{x}, \mathbf{y})^2. \end{aligned}$$

513 We express  $\mathbf{C}^{(k)}$  through  $A, \mathbf{B}^{(k)}$  and  $D$  through  $A$  using (20) in the equation above:

$$\begin{aligned} \text{Var}_{\nu_{\text{ADE}}} f_{\text{ADE}}^{(1)}(\boldsymbol{\omega}, \mathbf{x}) f_{\text{ADE}}^{(2)}(\boldsymbol{\omega}, \mathbf{y}) &= \left( \frac{1 - 4A}{\sqrt{1 - 8A}} \right)^d \exp \left( \left( \frac{2}{1 - 8A} - \frac{1}{1 - 4A} \right) \mathbf{x}^\top (\mathbf{B}^{(1)})^\top \mathbf{B}^{(1)} \mathbf{x} \right. \\ &\quad \left. + \left( \frac{2}{1 - 8A} - \frac{1}{1 - 4A} \right) \mathbf{y}^\top (\mathbf{B}^{(2)})^\top \mathbf{B}^{(2)} \mathbf{y} + \frac{4}{1 - 8A} \mathbf{x}^\top (\mathbf{B}^{(1)})^\top \mathbf{B}^{(2)} \mathbf{y} \right) - K^{(0)}(\mathbf{x}, \mathbf{y})^2. \end{aligned}$$

514 Since  $\frac{1}{1 - 4A}(\mathbf{B}^{(1)})^\top \mathbf{B}^{(2)}$  is a full-rank matrix  $\mathbf{I}_d$  (20), both  $\mathbf{B}^{(1)}$  and  $\mathbf{B}^{(2)}$  are full-rank. Hence, we  
 515 can express  $\mathbf{B}^{(2)} = (1 - 4A)(\mathbf{B}^{(1)})^{-\top}$ . Also, note that

$$\frac{2}{1 - 8A} - \frac{1}{1 - 4A} = \frac{2 - 8A - 1 + 8A}{(1 - 8A)(1 - 4A)} = (1 - 8A)^{-1}(1 - 4A)^{-1}.$$

516 We rewrite the expression for the variance using the identity above and the formula for  $\mathbf{B}^{(2)}$ :

$$\begin{aligned} \text{Var}_{\nu_{\text{ADE}}} f_{\text{ADE}}^{(1)}(\boldsymbol{\omega}, \mathbf{x}) f_{\text{ADE}}^{(2)}(\boldsymbol{\omega}, \mathbf{y}) &= \left( \frac{1 - 4A}{\sqrt{1 - 8A}} \right)^d \exp \left( (1 - 8A)^{-1}(1 - 4A)^{-1} \mathbf{x}^\top (\mathbf{B}^{(1)})^\top \mathbf{B}^{(1)} \mathbf{x} \right. \\ &\quad \left. + (1 - 8A)^{-1}(1 - 4A) \mathbf{y}^\top ((\mathbf{B}^{(1)})^\top \mathbf{B}^{(1)})^{-1} \mathbf{y} + 4(1 - 8A)^{-1}(1 - 4A) \mathbf{x}^\top \mathbf{y} \right) - K^{(0)}(\mathbf{x}, \mathbf{y})^2. \end{aligned}$$

517 We use the expression above to rewrite (8) for  $\langle \nu, f^{(1)}, f^{(2)} \rangle = \langle \nu_{\text{ADE}}, f_{\text{ADE}}^{(1)}, f_{\text{ADE}}^{(2)} \rangle$  as follows:

$$\begin{aligned} \bar{\mathcal{L}}(\boldsymbol{\theta}_{\text{ADE}}; \mathcal{X}, \mathcal{Y}, \mathcal{T}_{\text{ADE}}) &= L^{-2} \sum_{1 \leq i, j \leq L} \log(\text{Var}_{\nu_{\text{ADE}}} f_{\text{ADE}}^{(1)}(\boldsymbol{\omega}, \mathbf{x}^{(i)}) f_{\text{ADE}}^{(2)}(\boldsymbol{\omega}, \mathbf{y}^{(j)}) + K^{(0)}(\mathbf{x}^{(i)}, \mathbf{y}^{(j)})) \\ &= d \log(1 - 4A) - \frac{d}{2} \log(1 - 8A) + (1 - 8A)^{-1}(1 - 4A)^{-1} L^{-1} \sum_{i=1}^L (\mathbf{x}^{(i)})^\top (\mathbf{B}^{(1)})^\top \mathbf{B}^{(1)} \mathbf{x}^{(i)} \\ &\quad + (1 - 8A)^{-1}(1 - 4A) L^{-1} \sum_{j=1}^L (\mathbf{y}^{(j)})^\top (\mathbf{B}^{(1)})^{-1} (\mathbf{B}^{(1)})^{-\top} \mathbf{y}^{(j)} \end{aligned}$$

$$+4(1-8A)^{-1}(1-4A)L^{-2} \sum_{1 \leq i, j \leq L} (\mathbf{x}^{(i)})^\top \mathbf{y}^{(j)}. \quad (21)$$

518 Denote  $\mathbf{E} = (\mathbf{B}^{(1)})^\top \mathbf{B}^{(1)}$ . Then (21) becomes:

$$\begin{aligned} \bar{\mathcal{L}}(\boldsymbol{\theta}_{\text{ADE}}; \mathcal{X}, \mathcal{Y}, \mathcal{T}_{\text{ADE}}) &= d \log(1-4A) - \frac{d}{2} \log(1-8A) \\ &\quad + (1-8A)^{-1}(1-4A)^{-1} L^{-1} \sum_{i=1}^L (\mathbf{x}^{(i)})^\top \mathbf{E} \mathbf{x}^{(i)} \\ &\quad + (1-8A)^{-1}(1-4A)L^{-1} \sum_{j=1}^L (\mathbf{y}^{(j)})^\top \mathbf{E}^{-1} \mathbf{y}^{(j)} + 4(1-8A)^{-1}(1-4A)L^{-2} \sum_{1 \leq i, j \leq L} (\mathbf{x}^{(i)})^\top \mathbf{y}^{(j)}. \end{aligned} \quad (22)$$

519 We next prove the following lemma:

520 **Lemma A.2.** Let  $\mathbf{B}^{(1)*} = \sqrt{1-4A} \boldsymbol{\Sigma}^{1/2} \mathbf{U}^\top (\boldsymbol{\Lambda}^{(1)})^{-1/2} (\mathbf{Q}^{(1)})^\top$ . When  $A$  ( $8A < 1$ ) is fixed,  
521  $\mathbf{E} = \mathbf{E}^* = (\mathbf{B}^{(1)*})^\top \mathbf{B}^{(1)*}$  minimizes the right hand side of (22) with respect to  $\mathbf{E}$ .

522 *Proof.* We have:

$$\begin{aligned} L^{-1} \sum_{i=1}^L (\mathbf{x}^{(i)})^\top \mathbf{E} \mathbf{x}^{(i)} &= L^{-1} \sum_{i=1}^L \text{Trace}((\mathbf{x}^{(i)})^\top \mathbf{E} \mathbf{x}^{(i)}) = L^{-1} \sum_{i=1}^L \text{Trace}(\mathbf{E} \mathbf{x}^{(i)} (\mathbf{x}^{(i)})^\top) \\ &= \text{Trace} \left( \mathbf{E} \left( L^{-1} \sum_{i=1}^L \mathbf{x}^{(i)} (\mathbf{x}^{(i)})^\top \right) \right) = \text{Trace}(\mathbf{E} \mathbf{M}^{(1)}) \end{aligned}$$

523 where we use the cyclic property of trace  $\text{Trace}(\cdot)$  and linearity of trace. Analogously, we obtain  
524  $L^{-1} \sum_{j=1}^L (\mathbf{y}^{(j)})^\top \mathbf{E}^{-1} \mathbf{y}^{(j)} = \text{Trace}(\mathbf{E}^{-1} \mathbf{M}^{(2)})$ . Assuming that  $A$  is fixed, optimization of (22)  
525 with respect to  $\mathbf{E}$  reduces to the following minimization problem:

$$\min_{\mathbf{E} \in \mathbb{S}_d, \mathbf{E} \succ 0} \mathcal{F}(\mathbf{E}) = \beta_1 \text{Trace}(\mathbf{E} \mathbf{M}^{(1)}) + \beta_2 \text{Trace}(\mathbf{E}^{-1} \mathbf{M}^{(2)}) \quad (23)$$

526 where  $\beta_1 = (1-8A)^{-1}(1-4A)^{-1}$ ,  $\beta_2 = (1-8A)^{-1}(1-4A)$  and the constraint  $\mathbf{E} \in \mathbb{S}_d, \mathbf{E} \succ 0$   
527 follows from the fact that  $\mathbf{E} = (\mathbf{B}^{(1)})^\top \mathbf{B}^{(1)}$  and  $\mathbf{E}$  is invertible. We have  $1-8A > 0$  and  
528  $1-4A = (1-8A)/2 + 1/2 > 0$ . Hence,  $\beta_1, \beta_2 > 0$ . For any  $\mathbf{E} \succ 0$  and any  $\boldsymbol{\Delta} \in \mathbb{S}_d$  there is  $t \in \mathbb{R}$   
529 small enough such that  $\mathbf{E} + t\boldsymbol{\Delta}$  is invertible and the following Neumann series is convergent:

$$(\mathbf{E} + t\boldsymbol{\Delta})^{-1} = \mathbf{E}^{-1} (\mathbf{I}_d + t\boldsymbol{\Delta} \mathbf{E}^{-1})^{-1} = \sum_{l=0}^{\infty} (-t)^l \mathbf{E}^{-1} (\boldsymbol{\Delta} \mathbf{E}^{-1})^l$$

530 We further deduce:

$$\begin{aligned} \text{Trace}((\mathbf{E} + t\boldsymbol{\Delta})^{-1} \mathbf{M}^{(2)}) &= \text{Trace} \left( \left( \sum_{l=0}^{\infty} (-t)^l \mathbf{E}^{-1} (\boldsymbol{\Delta} \mathbf{E}^{-1})^l \right) \mathbf{M}^{(2)} \right) = \\ &= \sum_{l=0}^{\infty} (-t)^l \text{Trace} \left( \mathbf{E}^{-1} (\boldsymbol{\Delta} \mathbf{E}^{-1})^l \mathbf{M}^{(2)} \right) \end{aligned}$$

531 and, therefore,

$$\begin{aligned} \mathcal{F}(\mathbf{E} + t\boldsymbol{\Delta}) &= \beta_1 \text{Trace}((\mathbf{E} + t\boldsymbol{\Delta}) \mathbf{M}^{(1)}) + \beta_2 \sum_{l=0}^{\infty} (-t)^l \text{Trace} \left( \mathbf{E}^{-1} (\boldsymbol{\Delta} \mathbf{E}^{-1})^l \mathbf{M}^{(2)} \right) \\ &= \beta_1 \text{Trace}(\mathbf{E} \mathbf{M}^{(1)}) + t\beta_1 \text{Trace}(\boldsymbol{\Delta} \mathbf{M}^{(1)}) + \beta_2 \sum_{l=0}^{\infty} (-t)^l \text{Trace} \left( \mathbf{E}^{-1} (\boldsymbol{\Delta} \mathbf{E}^{-1})^l \mathbf{M}^{(2)} \right). \end{aligned} \quad (24)$$

Further, we have:

$$\begin{aligned}\frac{\partial}{\partial t}\mathcal{F}(\mathbf{E} + t\mathbf{\Delta}) &= \beta_1 \text{Trace}(\mathbf{\Delta}\mathbf{M}^{(1)}) + \beta_2 \sum_{l=1}^{\infty} (-1)^l l t^{l-1} \text{Trace} \left( \mathbf{E}^{-1} (\mathbf{\Delta}\mathbf{E}^{-1})^l \mathbf{M}^{(2)} \right), \\ \frac{\partial^2}{(\partial t)^2}\mathcal{F}(\mathbf{E} + t\mathbf{\Delta}) &= \beta_2 \sum_{l=2}^{\infty} (-1)^l l(l-1) t^{l-2} \text{Trace} \left( \mathbf{E}^{-1} (\mathbf{\Delta}\mathbf{E}^{-1})^l \mathbf{M}^{(2)} \right), \\ \left. \frac{\partial^2}{(\partial t)^2}\mathcal{F}(\mathbf{E} + t\mathbf{\Delta}) \right|_{t=0} &= 2\beta_2 \text{Trace} \left( \mathbf{E}^{-1} \mathbf{\Delta} \mathbf{E}^{-1} \mathbf{\Delta} \mathbf{E}^{-1} \mathbf{M}^{(2)} \right).\end{aligned}\quad (25)$$

We replace  $\mathbf{M}^{(2)} = \mathbf{Q}^{(2)}(\mathbf{\Lambda}^{(2)})^{1/2}(\mathbf{\Lambda}^{(2)})^{1/2}(\mathbf{Q}^{(2)})^\top$  and apply the cyclic property of trace in (25):

$$\begin{aligned}\left. \frac{\partial^2}{(\partial t)^2}\mathcal{F}(\mathbf{E} + t\mathbf{\Delta}) \right|_{t=0} &= 2\beta_2 \text{Trace} \left( (\mathbf{\Lambda}^{(2)})^{1/2} (\mathbf{Q}^{(2)})^\top \mathbf{E}^{-1} \mathbf{\Delta} \mathbf{E}^{-1} \mathbf{\Delta} \mathbf{E}^{-1} \mathbf{Q}^{(2)} (\mathbf{\Lambda}^{(2)})^{1/2} \right) \\ &= 2\beta_2 \text{Trace} (\mathbf{T} \mathbf{E}^{-1} \mathbf{T}^\top)\end{aligned}$$

where  $\mathbf{T} = (\mathbf{\Lambda}^{(2)})^{1/2} (\mathbf{Q}^{(2)})^\top \mathbf{E}^{-1} \mathbf{\Delta}$ . Since  $\mathbf{E}$  is positive definite,  $\mathbf{E}^{-1}$  is also positive definite and  $\mathbf{T} \mathbf{E}^{-1} \mathbf{T}^\top$  is at least positive semidefinite. Hence,  $\text{Trace} (\mathbf{T} \mathbf{E}^{-1} \mathbf{T}^\top) \geq 0$  and also  $\left. \frac{\partial^2}{(\partial t)^2}\mathcal{F}(\mathbf{E} + t\mathbf{\Delta}) \right|_{t=0} \geq 0$ . We conclude that  $\mathcal{F}(\mathbf{E})$  is a convex function on  $\{\mathbf{E} \in \mathbb{S}_d \mid \mathbf{E} \succ 0\}$ . Since  $\{\mathbf{E} \in \mathbb{S}_d \mid \mathbf{E} \succ 0\}$  is an open set, (every) global minimum  $\mathbf{E}$  of (23) satisfies two conditions

$$1) \mathbf{E} \succ 0, \quad \text{and} \quad 2) \nabla \mathcal{F}(\mathbf{E}) = \mathbf{0}_{d \times d} \quad (26)$$

Set  $t = 1$  and assume that  $\mathbf{\Delta} \in \mathbb{S}_d$  is small enough by norm so that  $\mathbf{E} + \mathbf{\Delta}$  is invertible and the Neumann series for  $(\mathbf{I}_d + \mathbf{\Delta} \mathbf{E}^{-1})^{-1}$  is convergent. Then, (24) holds for  $t = 1$ :

$$\begin{aligned}\mathcal{F}(\mathbf{E} + \mathbf{\Delta}) &= \beta_1 \text{Trace}(\mathbf{E} \mathbf{M}^{(1)}) + \beta_1 \text{Trace}(\mathbf{\Delta} \mathbf{M}^{(1)}) + \beta_2 \sum_{l=0}^{\infty} (-1)^l \text{Trace} \left( \mathbf{E}^{-1} (\mathbf{\Delta} \mathbf{E}^{-1})^l \mathbf{M}^{(2)} \right) \\ &= \mathcal{F}(\mathbf{E}) + \beta_1 \text{Trace}(\mathbf{\Delta} \mathbf{M}^{(1)}) + \beta_2 \sum_{l=1}^{\infty} (-1)^l \text{Trace} \left( \mathbf{E}^{-1} (\mathbf{\Delta} \mathbf{E}^{-1})^l \mathbf{M}^{(2)} \right) \\ &= \mathcal{F}(\mathbf{E}) + \beta_1 \text{Trace}(\mathbf{\Delta} \mathbf{M}^{(1)}) - \beta_2 \text{Trace} \left( \mathbf{E}^{-1} \mathbf{\Delta} \mathbf{E}^{-1} \mathbf{M}^{(2)} \right) \\ &\quad + \beta_2 \sum_{l=2}^{\infty} (-1)^l \text{Trace} \left( \mathbf{E}^{-1} (\mathbf{\Delta} \mathbf{E}^{-1})^l \mathbf{M}^{(2)} \right).\end{aligned}$$

Clearly,  $\beta_2 \sum_{l=2}^{\infty} (-1)^l \text{Trace} \left( \mathbf{E}^{-1} (\mathbf{\Delta} \mathbf{E}^{-1})^l \mathbf{M}^{(2)} \right) = o(\|\mathbf{\Delta}\|)$  where  $\|\cdot\|$  is an  $L_2$ -norm. Also, using the cyclic property of trace, we get:

$$\text{Trace} \left( \mathbf{E}^{-1} \mathbf{\Delta} \mathbf{E}^{-1} \mathbf{M}^{(2)} \right) = \text{Trace} \left( \mathbf{\Delta} \mathbf{E}^{-1} \mathbf{M}^{(2)} \mathbf{E}^{-1} \right).$$

Therefore, we have:

$$\mathcal{F}(\mathbf{E} + \mathbf{\Delta}) = \text{Trace} \left( \mathbf{\Delta} \left( \beta_1 \mathbf{M}^{(1)} - \beta_2 \mathbf{E}^{-1} \mathbf{M}^{(2)} \mathbf{E}^{-1} \right) \right) + o(\|\mathbf{\Delta}\|). \quad (27)$$

Since  $\mathbf{\Delta}, \mathbf{E}^{-1}, \mathbf{M}^{(1)}, \mathbf{M}^{(2)} \in \mathbb{S}_d$ , from (27) it follows that

$$\nabla \mathcal{F}(\mathbf{E}) = \beta_1 \mathbf{M}^{(1)} - \beta_2 \mathbf{E}^{-1} \mathbf{M}^{(2)} \mathbf{E}^{-1}. \quad (28)$$

Let  $\mathbf{E}^* = (\mathbf{B}^{(1)*})^\top \mathbf{B}^{(1)*} \succeq 0$ . Note that

$$\sqrt[4]{\frac{\beta_2}{\beta_1}} = \sqrt[4]{\frac{(1-8A)^{-1}(1-4A)}{(1-8A)^{-1}(1-4A)^{-1}}} = \sqrt{1-4A}.$$

Since  $\sqrt{\beta_2/\beta_1} \neq 0$ ,  $\mathbf{\Sigma}, \mathbf{U}, \mathbf{\Lambda}^{-1/2}, \mathbf{Q}^{(1)}$  are full-rank,  $\mathbf{E}^*$  is also full-rank, therefore  $\mathbf{E}^* \succ 0$  and it satisfies condition 1 from (26). Observe that

$$\mathbf{E}^* \mathbf{Q}^{(1)} (\mathbf{\Lambda}^{(1)})^{1/2} = \sqrt{\beta_2/\beta_1} \mathbf{Q}^{(1)} (\mathbf{\Lambda}^{(1)})^{-1/2} \mathbf{U} \mathbf{\Sigma} \mathbf{U}^\top (\mathbf{\Lambda}^{(1)})^{-1/2} (\mathbf{Q}^{(1)})^\top \mathbf{Q}^{(1)} (\mathbf{\Lambda}^{(1)})^{1/2}$$

$$\begin{aligned}
&= \sqrt{\beta_2/\beta_1} \mathbf{Q}^{(1)} (\mathbf{\Lambda}^{(1)})^{-1/2} \mathbf{U} \mathbf{\Sigma} \mathbf{U}^\top \\
&= \sqrt{\beta_2/\beta_1} \mathbf{Q}^{(1)} (\mathbf{\Lambda}^{(1)})^{-1/2} (\mathbf{U} \mathbf{\Sigma} \mathbf{V}^\top) \mathbf{V} \mathbf{U}^\top \\
&= \sqrt{\beta_2/\beta_1} \mathbf{Q}^{(1)} (\mathbf{\Lambda}^{(1)})^{-1/2} ((\mathbf{\Lambda}^{(1)})^{\frac{1}{2}} (\mathbf{Q}^{(1)})^\top \mathbf{Q}^{(2)} (\mathbf{\Lambda}^{(2)})^{\frac{1}{2}}) \mathbf{V} \mathbf{U}^\top \\
&= \sqrt{\beta_2/\beta_1} \mathbf{Q}^{(2)} (\mathbf{\Lambda}^{(2)})^{1/2} \mathbf{V} \mathbf{U}^\top
\end{aligned}$$

547 where we use definitions of  $\mathbf{E}^*$ ,  $\mathbf{U}$ ,  $\mathbf{\Sigma}$ ,  $\mathbf{V}$  and orthogonality of  $\mathbf{Q}^{(1)}$ ,  $\mathbf{Q}^{(2)}$ ,  $\mathbf{U}$ ,  $\mathbf{V}$ . Hence, we deduce  
548 that

$$\beta_1 \mathbf{E}^* \mathbf{M}^{(1)} \mathbf{E}^* = \beta_1 \mathbf{E}^* \mathbf{Q}^{(1)} (\mathbf{\Lambda}^{(1)})^{1/2} \left( (\mathbf{\Lambda}^{(1)})^{1/2} (\mathbf{Q}^{(1)})^\top \mathbf{E}^* \right) \quad (29)$$

$$\begin{aligned}
&= \beta_1 \frac{\beta_2}{\beta_1} \mathbf{Q}^{(2)} (\mathbf{\Lambda}^{(2)})^{1/2} \left( (\mathbf{\Lambda}^{(2)})^{1/2} (\mathbf{Q}^{(2)})^\top \right) \\
&= \beta_2 \mathbf{M}^{(2)} \quad (30)
\end{aligned}$$

549 by the definition of  $\mathbf{Q}^{(1)}$ ,  $\mathbf{\Lambda}^{(1)}$ ,  $\mathbf{Q}^{(2)}$ ,  $\mathbf{\Lambda}^{(2)}$  and due to orthogonality of  $\mathbf{V}$ ,  $\mathbf{U}$ . By left- and right-  
550 multiplication of (30) by  $(\mathbf{E}^*)^{-1}$  we deduce that

$$\beta_1 \mathbf{M}^{(1)} = \beta_2 (\mathbf{E}^*)^{-1} \mathbf{M}^{(2)} (\mathbf{E}^*)^{-1}$$

551 or, in other words,  $\nabla \mathcal{F}(\mathbf{E}^*) = \mathbf{0}_{d \times d}$  and the condition 2 from (26) is also satisfied. We conclude that  
552 the global minimum of (23) is achieved at  $\mathbf{E}^*$ .  $\square$

553 According to Lemma A.2,  $\mathbf{B}^{(1)} = \mathbf{B}^{(1)*}$  is a global minimum of (21)'s right hand side when  $A$  is  
554 fixed. Indeed, if there is  $\mathbf{B}^{(1)}$  which leads to a smaller value of (21),  $\mathbf{E} = (\mathbf{B}^{(1)})^\top \mathbf{B}^{(1)}$  would lead  
555 to a smaller value of (22)'s right hand side. Also, this  $\mathbf{E}$  is positive definite by definition (note that  
556  $\mathbf{B}^{(1)}$  is nonsingular), leading to contradiction with Lemma A.2.

557 Substituting  $\mathbf{E}^*$  instead of  $\mathbf{E}$  in (22) corresponds to the minimum value of  $\bar{\mathcal{L}}(\boldsymbol{\theta}_{\text{AGE}}; \alpha, \mathcal{X}, \mathcal{Y}, \mathcal{T}_{\text{AGE}})$   
558 for a fixed  $A$ . Our next step is to minimize this expression with respect to  $A$ . Denote  $\mathbf{F} =$   
559  $\mathbf{Q}^{(1)} (\mathbf{\Lambda}^{(1)})^{-1/2} \mathbf{U} \mathbf{\Sigma} \mathbf{U}^\top (\mathbf{\Lambda}^{(1)})^{-1/2} (\mathbf{Q}^{(1)})^\top$ . Then  $\mathbf{E}^* = (1 - 4A) \mathbf{F}$  where  $\mathbf{F}$  doesn't depend on  $A$ .  
560 We substitute  $\mathbf{E}^*$  into (22) and get:

$$\begin{aligned}
&d \log(1 - 4A) - \frac{d}{2} \log(1 - 8A) + (1 - 8A)^{-1} (1 - 4A)^{-1} \text{Trace}((1 - 4A) \mathbf{F} \mathbf{M}^{(1)}) \\
&\quad + (1 - 8A)^{-1} (1 - 4A) \text{Trace}((1 - 4A)^{-1} \mathbf{F}^{-1} \mathbf{M}^{(2)}) \\
&\quad + 4(1 - 8A)^{-1} (1 - 4A) L^{-2} \sum_{1 \leq i, j \leq L} (\mathbf{x}^{(i)})^\top \mathbf{y}^{(j)} \\
&= d \log(1 - 4A) - \frac{d}{2} \log(1 - 8A) + (1 - 8A)^{-1} \text{Trace}(\mathbf{F} \mathbf{M}^{(1)}) + (1 - 8A)^{-1} \text{Trace}(\mathbf{F}^{-1} \mathbf{M}^{(2)}) \\
&\quad + 2(1 + (1 - 8A)^{-1}) d\mu^{(3)} \quad (31)
\end{aligned}$$

561 where we also replace

$$L^{-2} \sum_{1 \leq i, j \leq L} (\mathbf{x}^{(i)})^\top \mathbf{y}^{(j)} = L^{-2} \left( \sum_{i=1}^L \mathbf{x}^{(i)} \right)^\top \left( \sum_{j=1}^L \mathbf{y}^{(j)} \right) = d\mu^{(3)}$$

562 and

$$(1 - 8A)^{-1} (1 - 4A) = \frac{(1 - 8A) + 1}{2(1 - 8A)} = \frac{1}{2} (1 + (1 - 8A)^{-1})$$

563 Based on (30) and since  $\mathbf{F} = \sqrt{\beta_1/\beta_2} \mathbf{E}^*$ , we conclude that  $\mathbf{F} \mathbf{M}^{(1)} \mathbf{F} = \mathbf{M}^{(2)}$ , or  $\mathbf{M}^{(1)} \mathbf{F} =$   
564  $\mathbf{F}^{-1} \mathbf{M}^{(2)}$ . Using the cyclic property of trace, we get:

$$\text{Trace}(\mathbf{F} \mathbf{M}^{(1)}) = \text{Trace}(\mathbf{M}^{(1)} \mathbf{F}) = \text{Trace}(\mathbf{F}^{-1} \mathbf{M}^{(2)}).$$

565 By the definition of  $\mathbf{F}$ ,  $\mathbf{\Lambda}^{(1)}$ ,  $\mathbf{Q}^{(1)}$  and using the cyclic property and orthogonality of  $\mathbf{Q}^{(1)}$ ,  $\mathbf{U}$ , we  
566 have:

$$\text{Trace}(\mathbf{F} \mathbf{M}^{(1)}) = \text{Trace} \left( \mathbf{Q}^{(1)} (\mathbf{\Lambda}^{(1)})^{-1/2} \mathbf{U} \mathbf{\Sigma} \mathbf{U}^\top (\mathbf{\Lambda}^{(1)})^{-1/2} \mathbf{Q}^{(1)} \right)^\top \left( \mathbf{Q}^{(1)} \mathbf{\Lambda}^{(1)} (\mathbf{Q}^{(1)})^\top \right)$$

$$\begin{aligned}
&= \text{Trace} \left( \mathbf{Q}^{(1)} (\mathbf{\Lambda}^{(1)})^{-1/2} \mathbf{U} \mathbf{\Sigma} \mathbf{U}^\top (\mathbf{\Lambda}^{(1)})^{1/2} (\mathbf{Q}^{(1)})^\top \right) \\
&= \text{Trace} \left( \mathbf{\Sigma} \mathbf{U}^\top (\mathbf{\Lambda}^{(1)})^{1/2} (\mathbf{Q}^{(1)})^\top \mathbf{Q}^{(1)} (\mathbf{\Lambda}^{(1)})^{-1/2} \mathbf{U} \right) \\
&= \text{Trace}(\mathbf{\Sigma}) = \sum_{l=1}^d \Sigma_{l,l}.
\end{aligned}$$

Hence, (31) finally becomes:

$$\begin{aligned}
&d \log(1 - 4A) - \frac{d}{2} \log(1 - 8A) + 2(1 - 8A)^{-1} \sum_{l=1}^d \Sigma_{l,l} + 2(1 + (1 - 8A)^{-1}) d\mu^{(3)} \\
&= d \left( \log(1 - 4A) - \frac{1}{2} \log(1 - 8A) + 2(1 - 8A)^{-1} \left( d^{-1} \sum_{l=1}^d \Sigma_{l,l} + \mu^{(3)} \right) + 2\mu^{(3)} \right). \quad (32)
\end{aligned}$$

Next, we use Lemma A.1 ( $\phi = d^{-1} \sum_{l=1}^d \Sigma_{l,l} + \mu^{(3)} \geq 0$ ) for deriving expression for  $A$  which minimizes (32). This expression coincides with the one in Theorem's statement. The expressions for  $\mathbf{B}^{(2)}$ ,  $\mathbf{C}^{(1)}$ ,  $\mathbf{C}^{(2)}$  follow directly from (20), optimal  $\mathbf{B}^{(1)} = \mathbf{B}^{(1)*}$  and  $A$ . (10) follows from (32). The proof is concluded.  $\square$

#### A.4 Proof of Theorem 4.3

*Proof.* With  $\mathbf{B}^{(1)} = \mathbf{B}^{(2)} = \mathbf{B}$  and  $\mathbf{C}^{(1)} = \mathbf{C}^{(2)} = \mathbf{C}$ , the conditions from Theorem 4.1 read as

$$8\mathbf{A} \prec \mathbf{I}_d, \quad \mathbf{B}^\top (\mathbf{I}_d - 4\mathbf{A})^{-1} \mathbf{B} = \mathbf{I}_d, \quad \mathbf{C} = -\frac{1}{2} \mathbf{B}^\top (\mathbf{I}_d - 4\mathbf{A})^{-1} \mathbf{B} = -\frac{1}{2} \mathbf{I}_d, \quad D = \det(\mathbf{I}_d - 4\mathbf{A})^{1/4}. \quad (33)$$

Denote  $\mathbf{Q} = (\mathbf{I}_d - 4\mathbf{A})^{-1/2} \mathbf{B} \in \mathbb{R}^{d \times d}$ . Then, according to (33),  $\mathbf{Q}^\top \mathbf{Q} = \mathbf{I}_d$ , that is  $\mathbf{Q} \in \mathbb{O}_d$ . We rewrite (9) using (33) and then substitute  $\mathbf{B} = (\mathbf{I}_d - 4\mathbf{A})^{1/2} \mathbf{Q}$ :

$$\begin{aligned}
&\text{Var}_{\nu_{\text{SDE}}} f_{\text{SDE}}^{(1)}(\boldsymbol{\omega}, \mathbf{x}) f_{\text{SDE}}^{(2)}(\boldsymbol{\omega}, \mathbf{y}) = \det(\mathbf{I}_d - 4\mathbf{A}) \det(\mathbf{I}_d - 8\mathbf{A})^{-1/2} \exp \left( -\|\mathbf{x}\|^2 \right. \\
&\quad \left. + 2\mathbf{x}^\top \mathbf{B}^\top (\mathbf{I}_d - 8\mathbf{A})^{-1} \mathbf{B} \mathbf{x} - \|\mathbf{y}\|^2 + 2\mathbf{y}^\top \mathbf{B}^\top (\mathbf{I}_d - 8\mathbf{A})^{-1} \mathbf{B} \mathbf{y} + 4\mathbf{x}^\top \mathbf{B}^\top (\mathbf{I}_d - 8\mathbf{A})^{-1} \mathbf{B} \mathbf{y} \right) \\
&\quad - K^{(0)}(\mathbf{x}, \mathbf{y})^2 = \det(\mathbf{I}_d - 4\mathbf{A})^{1/4} \det(\mathbf{I}_d - 8\mathbf{A})^{-1/2} \exp \left( -\|\mathbf{x}\|^2 - 2\mathbf{x}^\top \mathbf{Q}^\top \mathbf{E} \mathbf{Q} \mathbf{x} - \|\mathbf{y}\|^2 \right. \\
&\quad \left. - 2\mathbf{y}^\top \mathbf{Q}^\top \mathbf{E} \mathbf{Q} \mathbf{y} - 4\mathbf{x}^\top \mathbf{Q}^\top \mathbf{E} \mathbf{Q} \mathbf{y} \right) - K^{(0)}(\mathbf{x}, \mathbf{y})^2 \quad (34)
\end{aligned}$$

where we denote:

$$\begin{aligned}
\mathbf{E} &= -(\mathbf{I}_d - 4\mathbf{A})^{1/2} (\mathbf{I}_d - 8\mathbf{A})^{-1} (\mathbf{I}_d - 4\mathbf{A})^{1/2} = -(\mathbf{I}_d - 4\mathbf{A})(\mathbf{I}_d - 8\mathbf{A})^{-1} \\
&= -\frac{1}{2} ((\mathbf{I}_d - 8\mathbf{A}) + \mathbf{I}_d) (\mathbf{I}_d - 8\mathbf{A})^{-1} = -\frac{1}{2} \mathbf{I}_d - \frac{1}{2} (\mathbf{I}_d - 8\mathbf{A})^{-1} \quad (35)
\end{aligned}$$

which is in  $\mathbb{D}_d$  since  $\mathbf{A} \in \mathbb{D}_d$ . Next, we observe:

$$2\mathbf{x}^\top \mathbf{Q}^\top \mathbf{E} \mathbf{Q} \mathbf{x} + 2\mathbf{y}^\top \mathbf{Q}^\top \mathbf{E} \mathbf{Q} \mathbf{y} + 4\mathbf{x}^\top \mathbf{Q}^\top \mathbf{E} \mathbf{Q} \mathbf{y} = 2(\mathbf{x} + \mathbf{y})^\top \mathbf{Q}^\top \mathbf{E} \mathbf{Q} (\mathbf{x} + \mathbf{y})$$

We plug this into (34) and use the resulting expression to rewrite (8) for  $\langle \nu, f^{(1)}, f^{(2)} \rangle = \langle \nu_{\text{SDE}}, f_{\text{SDE}}^{(1)}, f_{\text{SDE}}^{(2)} \rangle$  as follows:

$$\begin{aligned}
\bar{\mathcal{L}}(\boldsymbol{\theta}_{\text{SDE}}; \mathcal{X}, \mathcal{Y}, \mathcal{T}_{\text{SDE}}) &= L^{-2} \sum_{1 \leq i, j \leq L} \log(\text{Var}_{\nu_{\text{SDE}}} f_{\text{SDE}}^{(1)}(\boldsymbol{\omega}, \mathbf{x}^{(i)}) f_{\text{SDE}}^{(2)}(\boldsymbol{\omega}, \mathbf{y}^{(j)}) + K^{(0)}(\mathbf{x}^{(i)}, \mathbf{y}^{(j)})) \\
&= \log \det(\mathbf{I}_d - 4\mathbf{A}) - \frac{1}{2} \log \det(\mathbf{I}_d - 8\mathbf{A}) - L^{-1} \sum_{i=1}^L \|\mathbf{x}^{(i)}\|^2 - L^{-1} \sum_{j=1}^L \|\mathbf{y}^{(j)}\|^2 \\
&\quad - 2L^{-2} \sum_{1 \leq i, j \leq L} (\mathbf{x}^{(i)} + \mathbf{y}^{(j)})^\top \mathbf{Q}^\top \mathbf{E} \mathbf{Q} (\mathbf{x}^{(i)} + \mathbf{y}^{(j)}). \quad (36)
\end{aligned}$$

580 Using linearity and cyclic property of trace, we deduce that

$$\begin{aligned}
& L^{-2} \sum_{1 \leq i, j \leq L} (\mathbf{x}^{(i)} + \mathbf{y}^{(j)})^\top \mathbf{Q}^\top \mathbf{E} \mathbf{Q} (\mathbf{x}^{(i)} + \mathbf{y}^{(j)}) = \\
& = L^{-2} \sum_{1 \leq i, j \leq L} \text{Trace} \left( (\mathbf{x}^{(i)} + \mathbf{y}^{(j)})^\top \mathbf{Q}^\top \mathbf{E} \mathbf{Q} (\mathbf{x}^{(i)} + \mathbf{y}^{(j)}) \right) \\
& = L^{-2} \sum_{1 \leq i, j \leq L} \text{Trace} \left( \mathbf{Q}^\top \mathbf{E} \mathbf{Q} (\mathbf{x}^{(i)} + \mathbf{y}^{(j)}) (\mathbf{x}^{(i)} + \mathbf{y}^{(j)})^\top \right) \\
& = \text{Trace} \left( \mathbf{Q}^\top \mathbf{E} \mathbf{Q} \left( L^{-2} \sum_{1 \leq i, j \leq L} (\mathbf{x}^{(i)} + \mathbf{y}^{(j)}) (\mathbf{x}^{(i)} + \mathbf{y}^{(j)})^\top \right) \right)
\end{aligned}$$

581 Observe that

$$\begin{aligned}
& L^{-2} \sum_{1 \leq i, j \leq L} (\mathbf{x}^{(i)} + \mathbf{y}^{(j)}) (\mathbf{x}^{(i)} + \mathbf{y}^{(j)})^\top = \\
& = L^{-2} \sum_{1 \leq i, j \leq L} \left( \mathbf{x}^{(i)} (\mathbf{x}^{(i)})^\top + \mathbf{x}^{(i)} (\mathbf{y}^{(j)})^\top + \mathbf{y}^{(j)} (\mathbf{x}^{(i)})^\top + \mathbf{y}^{(j)} (\mathbf{y}^{(j)})^\top \right) \\
& = L^{-1} \sum_{i=1}^L \mathbf{x}^{(i)} (\mathbf{x}^{(i)})^\top + \left( L^{-1} \sum_{i=1}^L \mathbf{x}^{(i)} \right) \left( L^{-1} \sum_{j=1}^L \mathbf{y}^{(j)} \right)^\top + \left( L^{-1} \sum_{j=1}^L \mathbf{y}^{(j)} \right) \left( L^{-1} \sum_{i=1}^L \mathbf{x}^{(i)} \right)^\top \\
& \quad + L^{-1} \sum_{j=1}^L \mathbf{y}^{(j)} (\mathbf{y}^{(j)})^\top = \mathbf{M}^{(1)} + \boldsymbol{\mu}^{(4)} (\boldsymbol{\mu}^{(5)})^\top + \boldsymbol{\mu}^{(5)} (\boldsymbol{\mu}^{(4)})^\top + \mathbf{M}^{(2)}.
\end{aligned}$$

582 Denote  $\mathbf{N} = \mathbf{M}^{(1)} + \boldsymbol{\mu}^{(4)} (\boldsymbol{\mu}^{(5)})^\top + \boldsymbol{\mu}^{(5)} (\boldsymbol{\mu}^{(4)})^\top + \mathbf{M}^{(2)}$ . We conclude that

$$\begin{aligned}
\bar{\mathcal{L}}(\boldsymbol{\theta}_{\text{SDE}}; \mathcal{X}, \mathcal{Y}, \mathcal{T}_{\text{SDE}}) &= \log \det(\mathbf{I}_d - 4\mathbf{A}) - \frac{1}{2} \log \det(\mathbf{I}_d - 8\mathbf{A}) - L^{-1} \sum_{i=1}^L \|\mathbf{x}^{(i)}\|^2 \\
&\quad - L^{-1} \sum_{j=1}^L \|\mathbf{y}^{(j)}\|^2 - 2 \text{Trace}(\mathbf{Q}^\top \mathbf{E} \mathbf{Q} \mathbf{N}). \tag{37}
\end{aligned}$$

583 With  $\mathbf{A}$  fixed, we minimize the right hand side of (37) with respect to  $\mathbf{Q}$  which is equivalent  
584 to minimizing  $\bar{\mathcal{L}}(\boldsymbol{\theta}_{\text{SDE}}; \mathcal{X}, \mathcal{Y}, \mathcal{T}_{\text{SDE}})$  with respect to  $\mathbf{B}$  with fixed  $\mathbf{A}$ , since there is a one-to-one  
585 correspondence between  $\mathbf{B}$  and  $\mathbf{Q}$ . This is equivalent to maximizing, again using the cyclic property  
586 of trace,

$$\text{Trace}(\mathbf{Q}^\top \mathbf{E} \mathbf{Q} \mathbf{N}) = \text{Trace}(\mathbf{E} \mathbf{Q} \mathbf{N} \mathbf{Q}^\top) \tag{38}$$

587 with respect to  $\mathbf{Q}$ . We prove the following lemma first:

588 **Lemma A.3.** Suppose that diagonal entries of  $\mathbf{E}$  are all distinct, and the same holds for  $\boldsymbol{\Lambda}^{(3)}$ . Let  
589  $\boldsymbol{\Pi} \in \{0, 1\}^{d \times d}$  be a permutation matrix sorting diagonal entries of  $\mathbf{E}$  (i.e. by applying  $\boldsymbol{\Pi} \mathbf{E} \boldsymbol{\Pi}^\top$ ) in a  
590 descending order corresponding to a permutation  $\pi \in \mathbb{N}^d$ . Set  $\mathbf{Q}^* = \boldsymbol{\Pi}^\top (\mathbf{Q}^{(3)})^\top \in \mathbb{O}_d$ . Then we  
591 have:

$$\text{Trace}(\mathbf{E} \mathbf{Q}^* \mathbf{N} (\mathbf{Q}^*)^\top) = \sum_{l=1}^d \mathbf{E}_{\pi_l, \pi_l} \boldsymbol{\Lambda}_{l,l}^{(3)} \tag{39}$$

$$= \sup_{\mathbf{Q} \in \mathbb{O}_d} \text{Trace}(\mathbf{E} \mathbf{Q} \mathbf{N} \mathbf{Q}^\top) \tag{40}$$

592 *Proof.* First of all, we have:

$$\text{Trace}(\mathbf{E} \mathbf{Q}^* \mathbf{N} (\mathbf{Q}^*)^\top) = \text{Trace}(\mathbf{E} \boldsymbol{\Pi}^\top (\mathbf{Q}^{(3)})^\top \mathbf{N} \mathbf{Q}^{(3)} \boldsymbol{\Pi}) = \text{Trace}(\mathbf{E} \boldsymbol{\Pi}^\top \boldsymbol{\Lambda}^{(3)} \boldsymbol{\Pi}) \tag{41}$$



$$= \text{Trace} \left( \Pi \mathbf{E} \Pi^\top \mathbf{\Lambda}^{(3)} \right) = \sum_{l=1}^d \mathbf{E}_{\pi_l, \pi_l} \mathbf{\Lambda}_{l,l}^{(3)}, \quad (42)$$

593 i.e. (39) is satisfied.

594 Optimization for finding  $\sup_{\mathbf{Q} \in \mathbb{O}_d} \text{Trace}(\mathbf{E} \mathbf{Q} \mathbf{N} \mathbf{Q}^\top)$  is a well-studied problem [8]. By the definition,  
 595  $\mathbf{\Lambda}^{(3)}$  has eigenvalues of  $\mathbf{N}$  on the main diagonal and  $\mathbf{E} \in \mathbb{D}_d$  hence it contains its eigenvalues on its  
 596 main diagonal. Then, as proven in [8],  $\mathbf{Q}^*$  is indeed a global maximum of this problem in the case of  
 597 distinct eigenvalues for  $\mathbf{E}$  and  $\mathbf{N}$ . That is, (40) is proven.  $\square$

598 Next, we prove a generalization of Lemma A.3 when diagonal entries of  $\mathbf{E}$  and  $\mathbf{\Lambda}^{(3)}$  are not necessarily  
 599 distinct:

600 **Lemma A.4.** *Let  $\Pi \in \{0, 1\}^{d \times d}$  be a permutation matrix sorting diagonal entries of  $\mathbf{E}$  (i.e. by*  
 601 *applying  $\Pi \mathbf{E} \Pi^\top$ ) in **any non-ascending** order corresponding to a permutation  $\pi \in \mathbb{N}^d$ . Set*  
 602  *$\mathbf{Q}^* = \Pi^\top (\mathbf{Q}^{(3)})^\top \in \mathbb{O}_d$ . Then we have:*

$$\text{Trace}(\mathbf{E} \mathbf{Q}^* \mathbf{N} (\mathbf{Q}^*)^\top) = \sum_{l=1}^d \mathbf{E}_{\pi_l, \pi_l} \mathbf{\Lambda}_{l,l}^{(3)} \quad (43)$$

$$= \sup_{\mathbf{Q} \in \mathbb{O}_d} \text{Trace}(\mathbf{E} \mathbf{Q} \mathbf{N} \mathbf{Q}^\top) \quad (44)$$

603 *Proof.* In the same way as (41-42), we show that  $\text{Trace}(\mathbf{E} \mathbf{Q}^* \mathbf{N} (\mathbf{Q}^*)^\top) = \sum_{l=1}^d \mathbf{E}_{\pi_l, \pi_l} \mathbf{\Lambda}_{l,l}^{(3)}$ , i.e.  
 604 (43) is satisfied. Next we prove that for any  $\mathbf{Q} \in \mathbb{O}_d$ ,

$$\text{Trace}(\mathbf{E} \mathbf{Q} \mathbf{N} \mathbf{Q}^\top) \leq \sum_{l=1}^d \mathbf{E}_{\pi_l, \pi_l} \mathbf{\Lambda}_{l,l}^{(3)}. \quad (45)$$

605 which would imply (44).

606 Our proof is by contradiction. First of all, we can assume that  $\mathbf{E}, \mathbf{\Lambda}^{(3)}$  are nonzero matrices since  
 607 otherwise we have (44) trivially. Since  $\text{Trace}(\mathbf{E} \mathbf{Q} \mathbf{N} \mathbf{Q}^\top)$  is a continuous function of  $\mathbf{Q}$  and  $\mathbb{O}_d$  is  
 608 compact,  $\sup_{\mathbf{Q} \in \mathbb{O}_d} \text{Trace}(\mathbf{E} \mathbf{Q} \mathbf{N} \mathbf{Q}^\top)$  is finite. Suppose that there is  $\delta > 0$  such that

$$\delta = \sup_{\mathbf{Q} \in \mathbb{O}_d} \text{Trace}(\mathbf{E} \mathbf{Q} \mathbf{N} \mathbf{Q}^\top) - \sum_{l=1}^d \mathbf{E}_{\pi_l, \pi_l} \mathbf{\Lambda}_{l,l}^{(3)}. \quad (46)$$

609 Let  $\tilde{\mathbf{E}}, \tilde{\mathbf{\Lambda}}^{(3)} \in \mathbb{D}_d$  be matrices with all distinct values on the diagonal such that

$$\|\tilde{\mathbf{E}} - \mathbf{E}\|_F \leq \min \left( \|\mathbf{E}\|_F, \frac{\delta}{12\|\mathbf{\Lambda}^{(3)}\|_F} \right), \quad \|\tilde{\mathbf{\Lambda}}^{(3)} - \mathbf{\Lambda}^{(3)}\|_F \leq \frac{\delta}{12\|\mathbf{E}\|_F} \quad (47)$$

610 where  $\|\cdot\|_F$  denotes Frobenius norm and  $\|\mathbf{E}\|_F, \|\mathbf{\Lambda}^{(3)}\|_F \neq 0$  since these are nonzero matrices.

611 Further, we assume that diagonal entries of  $\tilde{\mathbf{\Lambda}}^{(3)}$  are sorted in a descending order and, in addition  
 612 to  $\mathbf{\Lambda}^{(3)}$ ,  $\pi$  also sorts entries of  $\tilde{\mathbf{E}}$  in a non-ascending (descending) order. Clearly, such  $\tilde{\mathbf{E}}, \tilde{\mathbf{\Lambda}}^{(3)}$  can  
 613 be obtained by small perturbations of  $\mathbf{E}, \mathbf{\Lambda}^{(3)}$ . Also, denote  $\tilde{\mathbf{N}} = \mathbf{Q}^{(3)} \tilde{\mathbf{\Lambda}}^{(3)} (\mathbf{Q}^{(3)})^\top$ . Since  $\mathbb{O}_d$  is  
 614 a compact closed set and  $\text{Trace}(\mathbf{E} \mathbf{Q} \mathbf{N} \mathbf{Q}^\top)$  is a continuous function of  $\mathbf{Q}$ , there exists  $\mathbf{Q}^{**} \in \mathbb{O}_d$   
 615 such that

$$\text{Trace}(\mathbf{E} \mathbf{Q}^{**} \mathbf{N} (\mathbf{Q}^{**})^\top) = \sup_{\mathbf{Q} \in \mathbb{O}_d} \text{Trace}(\mathbf{E} \mathbf{Q} \mathbf{N} \mathbf{Q}^\top). \quad (48)$$

616 By the definition of  $\tilde{\mathbf{E}}, \tilde{\mathbf{\Lambda}}^{(3)}, \tilde{\mathbf{N}}$ , we have:

$$\begin{aligned} & \text{Trace}(\mathbf{E} \mathbf{Q}^{**} \mathbf{N} (\mathbf{Q}^{**})^\top) - \text{Trace}(\tilde{\mathbf{E}} \mathbf{Q}^{**} \tilde{\mathbf{N}} (\mathbf{Q}^{**})^\top) \\ &= \left( \text{Trace}(\mathbf{E} \mathbf{Q}^{**} \mathbf{N} (\mathbf{Q}^{**})^\top) - \text{Trace}(\mathbf{E} \mathbf{Q}^{**} \tilde{\mathbf{N}} (\mathbf{Q}^{**})^\top) \right) + \left( \text{Trace}(\mathbf{E} \mathbf{Q}^{**} \tilde{\mathbf{N}} (\mathbf{Q}^{**})^\top) - \text{Trace}(\tilde{\mathbf{E}} \mathbf{Q}^{**} \tilde{\mathbf{N}} (\mathbf{Q}^{**})^\top) \right) \end{aligned}$$

$$\begin{aligned}
& -\text{Trace} \left( \tilde{\mathbf{E}} \mathbf{Q}^{**} \tilde{\mathbf{N}} (\mathbf{Q}^{**})^\top \right) \\
& = \text{Trace} \left( \mathbf{E} \mathbf{Q}^{**} (\mathbf{N} - \tilde{\mathbf{N}}) (\mathbf{Q}^{**})^\top \right) + \text{Trace} \left( (\mathbf{E} - \tilde{\mathbf{E}}) \mathbf{Q}^{**} \tilde{\mathbf{N}} (\mathbf{Q}^{**})^\top \right).
\end{aligned}$$

Next, we apply Cauchy-Schwarz inequality to both terms:

$$\begin{aligned}
\text{Trace} \left( \mathbf{E} \mathbf{Q}^{**} (\mathbf{N} - \tilde{\mathbf{N}}) (\mathbf{Q}^{**})^\top \right) & \leq \|(\mathbf{Q}^{**})^\top \mathbf{E}\|_F \|(\mathbf{N} - \tilde{\mathbf{N}}) (\mathbf{Q}^{**})^\top\|_F = \|\mathbf{E}\|_F \|\mathbf{N} - \tilde{\mathbf{N}}\|_F, \\
\text{Trace} \left( (\mathbf{E} - \tilde{\mathbf{E}}) \mathbf{Q}^{**} \tilde{\mathbf{N}} (\mathbf{Q}^{**})^\top \right) & \leq \|(\mathbf{Q}^{**})^\top (\mathbf{E} - \tilde{\mathbf{E}})\|_F \|\tilde{\mathbf{N}} (\mathbf{Q}^{**})^\top\|_F = \|\mathbf{E} - \tilde{\mathbf{E}}\|_F \|\tilde{\mathbf{N}}\|_F
\end{aligned}$$

where we use invariance of the Frobenius norm under multiplications by orthogonal matrices. Using this invariance again, we deduce that

$$\begin{aligned}
\|\mathbf{N} - \tilde{\mathbf{N}}\|_F & = \|\mathbf{Q}^{(3)} (\mathbf{\Lambda}^{(3)} - \tilde{\mathbf{\Lambda}}^{(3)}) (\mathbf{Q}^{(3)})^\top\|_F = \|\mathbf{\Lambda}^{(3)} - \tilde{\mathbf{\Lambda}}^{(3)}\|_F, \\
\|\tilde{\mathbf{N}}\|_F & = \|\mathbf{Q}^{(3)} \tilde{\mathbf{\Lambda}}^{(3)} (\mathbf{Q}^{(3)})^\top\|_F = \|\tilde{\mathbf{\Lambda}}^{(3)}\|_F.
\end{aligned}$$

We conclude that

$$\text{Trace} \left( \mathbf{E} \mathbf{Q}^{**} \mathbf{N} (\mathbf{Q}^{**})^\top \right) \leq \text{Trace} \left( \tilde{\mathbf{E}} \mathbf{Q}^{**} \tilde{\mathbf{N}} (\mathbf{Q}^{**})^\top \right) + \|\mathbf{E}\|_F \|\mathbf{\Lambda}^{(3)} - \tilde{\mathbf{\Lambda}}^{(3)}\|_F + \|\mathbf{E} - \tilde{\mathbf{E}}\|_F \|\tilde{\mathbf{\Lambda}}^{(3)}\|_F. \quad (49)$$

Next, we apply Lemma A.3 to  $\mathbf{E} = \hat{\mathbf{E}}$ ,  $\mathbf{\Lambda}^{(3)} = \hat{\mathbf{\Lambda}}^{(3)}$  and deduce that

$$\begin{aligned}
\text{Trace} \left( \tilde{\mathbf{E}} \mathbf{Q}^{**} \tilde{\mathbf{N}} (\mathbf{Q}^{**})^\top \right) & \leq \sum_{l=1}^d \tilde{\mathbf{E}}_{\pi_l, \pi_l} \tilde{\mathbf{\Lambda}}_{l,l}^{(3)} = \sum_{l=1}^d \left( \mathbf{E}_{\pi_l, \pi_l} \mathbf{\Lambda}_{l,l}^{(3)} + \left( \tilde{\mathbf{E}}_{\pi_l, \pi_l} - \mathbf{E}_{\pi_l, \pi_l} \right) \mathbf{\Lambda}_{l,l}^{(3)} \right. \\
& \quad \left. + \tilde{\mathbf{E}}_{\pi_l, \pi_l} \left( \tilde{\mathbf{\Lambda}}_{l,l}^{(3)} - \mathbf{\Lambda}_{l,l}^{(3)} \right) \right) \\
& = \sum_{l=1}^d \mathbf{E}_{\pi_l, \pi_l} \mathbf{\Lambda}_{l,l}^{(3)} + \sum_{l=1}^d \left( \tilde{\mathbf{E}}_{\pi_l, \pi_l} - \mathbf{E}_{\pi_l, \pi_l} \right) \mathbf{\Lambda}_{l,l}^{(3)} + \sum_{l=1}^d \tilde{\mathbf{E}}_{\pi_l, \pi_l} \left( \tilde{\mathbf{\Lambda}}_{l,l}^{(3)} - \mathbf{\Lambda}_{l,l}^{(3)} \right) \\
& = \sum_{l=1}^d \mathbf{E}_{\pi_l, \pi_l} \mathbf{\Lambda}_{l,l}^{(3)} + \text{Trace} \left( \mathbf{\Pi} (\tilde{\mathbf{E}} - \mathbf{E}) \mathbf{\Pi}^\top \tilde{\mathbf{\Lambda}}^{(3)} \right) + \text{Trace} \left( \mathbf{\Pi} \tilde{\mathbf{E}} \mathbf{\Pi}^\top (\tilde{\mathbf{\Lambda}}^{(3)} - \mathbf{\Lambda}^{(3)}) \right).
\end{aligned}$$

We apply Cauchy-Schwarz inequality again to the second and the third term:

$$\begin{aligned}
\text{Trace} \left( \mathbf{\Pi} (\tilde{\mathbf{E}} - \mathbf{E}) \mathbf{\Pi}^\top \tilde{\mathbf{\Lambda}}^{(3)} \right) & \leq \|(\tilde{\mathbf{E}} - \mathbf{E}) \mathbf{\Pi}^\top\|_F \|\mathbf{\Pi}^\top \tilde{\mathbf{\Lambda}}^{(3)}\|_F = \|\tilde{\mathbf{E}} - \mathbf{E}\|_F \|\tilde{\mathbf{\Lambda}}^{(3)}\|_F, \\
\text{Trace} \left( \mathbf{\Pi} \tilde{\mathbf{E}} \mathbf{\Pi}^\top (\tilde{\mathbf{\Lambda}}^{(3)} - \mathbf{\Lambda}^{(3)}) \right) & \leq \|\tilde{\mathbf{E}} \mathbf{\Pi}^\top\|_F \|\mathbf{\Pi}^\top (\tilde{\mathbf{\Lambda}}^{(3)} - \mathbf{\Lambda}^{(3)})\|_F = \|\tilde{\mathbf{E}}\|_F \|\tilde{\mathbf{\Lambda}}^{(3)} - \mathbf{\Lambda}^{(3)}\|_F
\end{aligned}$$

where we use invariance of the Frobenius norm under column and row permutations. We conclude that

$$\text{Trace} \left( \tilde{\mathbf{E}} \mathbf{Q}^{**} \tilde{\mathbf{N}} (\mathbf{Q}^{**})^\top \right) \leq \sum_{l=1}^d \mathbf{E}_{\pi_l, \pi_l} \mathbf{\Lambda}_{l,l}^{(3)} + \|\tilde{\mathbf{E}} - \mathbf{E}\|_F \|\tilde{\mathbf{\Lambda}}^{(3)}\|_F + \|\tilde{\mathbf{E}}\|_F \|\tilde{\mathbf{\Lambda}}^{(3)} - \mathbf{\Lambda}^{(3)}\|_F.$$

We combine this inequality with (49) and obtain:

$$\text{Trace} \left( \mathbf{E} \mathbf{Q}^{**} \mathbf{N} (\mathbf{Q}^{**})^\top \right) \leq \sum_{l=1}^d \mathbf{E}_{\pi_l, \pi_l} \mathbf{\Lambda}_{l,l}^{(3)} + 2\|\mathbf{E}\|_F \|\mathbf{\Lambda}^{(3)} - \tilde{\mathbf{\Lambda}}^{(3)}\|_F + 2\|\mathbf{E} - \tilde{\mathbf{E}}\|_F \|\tilde{\mathbf{\Lambda}}^{(3)}\|_F. \quad (50)$$

Next, we use triangle inequality and deduce that

$$\|\tilde{\mathbf{\Lambda}}^{(3)}\|_F \leq \|\mathbf{\Lambda}^{(3)}\|_F + \|\tilde{\mathbf{\Lambda}}^{(3)} - \mathbf{\Lambda}^{(3)}\|_F.$$

Hence, we continue (50):

$$\text{Trace} \left( \mathbf{E} \mathbf{Q}^{**} \mathbf{N} (\mathbf{Q}^{**})^\top \right) \leq \sum_{l=1}^d \mathbf{E}_{\pi_l, \pi_l} \mathbf{\Lambda}_{l,l}^{(3)} + 2\|\mathbf{E}\|_F \|\mathbf{\Lambda}^{(3)}\|_F$$

$$\begin{aligned}
& -\tilde{\mathbf{\Lambda}}^{(3)}\|_F + 2\|\mathbf{E} - \tilde{\mathbf{E}}\|_F \left( \|\mathbf{\Lambda}^{(3)}\|_F + \|\tilde{\mathbf{\Lambda}}^{(3)} - \mathbf{\Lambda}^{(3)}\|_F \right) \\
& = \sum_{l=1}^d \mathbf{E}_{\pi_l, \pi_l} \mathbf{\Lambda}_{l,l}^{(3)} + 2\|\mathbf{E}\|_F \|\mathbf{\Lambda}^{(3)} - \tilde{\mathbf{\Lambda}}^{(3)}\|_F + 2\|\mathbf{\Lambda}^{(3)}\|_F \|\mathbf{E} - \tilde{\mathbf{E}}\|_F + 2\|\mathbf{E} - \tilde{\mathbf{E}}\|_F \|\tilde{\mathbf{\Lambda}}^{(3)} - \mathbf{\Lambda}^{(3)}\|_F \\
& \leq \sum_{l=1}^d \mathbf{E}_{\pi_l, \pi_l} \mathbf{\Lambda}_{l,l}^{(3)} + 2\|\mathbf{E}\|_F \|\mathbf{\Lambda}^{(3)} - \tilde{\mathbf{\Lambda}}^{(3)}\|_F + 2\|\mathbf{\Lambda}^{(3)}\|_F \|\mathbf{E} - \tilde{\mathbf{E}}\|_F + 2\|\mathbf{E}\|_F \|\tilde{\mathbf{\Lambda}}^{(3)} - \mathbf{\Lambda}^{(3)}\|_F
\end{aligned}$$

628 where in the last transition we use  $\|\mathbf{E} - \tilde{\mathbf{E}}\|_F \leq \|\mathbf{E}\|_F$  which is according to (47). We continue this  
629 chain of inequalities using (47) again:

$$\begin{aligned}
\text{Trace}(\mathbf{E}\mathbf{Q}^{**}\mathbf{N}(\mathbf{Q}^{**})^\top) & \leq \sum_{l=1}^d \mathbf{E}_{\pi_l, \pi_l} \mathbf{\Lambda}_{l,l}^{(3)} + \frac{2}{12}\delta + \frac{2}{12}\delta + \frac{2}{12}\delta = \sum_{l=1}^d \mathbf{E}_{\pi_l, \pi_l} \mathbf{\Lambda}_{l,l}^{(3)} + \frac{\delta}{2} \\
& < \sum_{l=1}^d \mathbf{E}_{\pi_l, \pi_l} \mathbf{\Lambda}_{l,l}^{(3)} + \delta.
\end{aligned}$$

630 This is a contradiction with (46) taking into account  $\mathbf{Q}^{**}$ 's definition (48). Hence, (44) is proven.  $\square$

631 Let  $\mathbf{Q}^*$  be defined as in Lemma A.4's statement. Further, we denote  $\pi(\mathbf{A}) = \pi$ ,  $\Pi(\mathbf{A}) = \Pi$  where  
632  $\pi, \Pi$  are defined as in Lemma A.4's statement. That is,  $\pi(\mathbf{A})$  denotes some permutation which sorts  
633 diagonal entries of  $\mathbf{E}$  in a non-ascending order. It's a function of  $\mathbf{A}$  since  $\mathbf{E}$  is a function of  $\mathbf{A}$  defined  
634 in (35). In fact, based on (35), we see that  $\pi(\mathbf{A})$  is some permutation which sorts diagonal entries of  
635  $\mathbf{A}$  in a non-descending order.  $\Pi(\mathbf{A})$  denotes a permutation matrix corresponding to  $\pi(\mathbf{A})$ . That is,  
636 diagonal entries of  $\Pi(\mathbf{A})\mathbf{A}\Pi(\mathbf{A})^\top$  are sorted in a non-descending order.

637 Let  $\mathcal{G}(\mathbf{A})$  denote the right hand side of (37) where we substitute  $\mathbf{Q} = \mathbf{Q}^*$ . That is,  $\mathcal{G}(\mathbf{A})$  is an  
638 optimal value of  $\bar{\mathcal{L}}(\theta_{\text{SDE}}; \mathcal{X}, \mathcal{Y}, \mathcal{T}_{\text{SDE}})$  with  $\mathbf{A}$  fixed:

$$\begin{aligned}
\mathcal{G}(\mathbf{A}) & = \log \det(\mathbf{I}_d - 4\mathbf{A}) - \frac{1}{2} \log \det(\mathbf{I}_d - 8\mathbf{A}) - L^{-1} \sum_{i=1}^L \|\mathbf{x}^{(i)}\|^2 - L^{-1} \sum_{j=1}^L \|\mathbf{y}^{(j)}\|^2 \\
& \quad - 2 \sum_{l=1}^d \mathbf{E}_{\pi(\mathbf{A})_l, \pi(\mathbf{A})_l} \mathbf{\Lambda}_{l,l}^{(3)} \\
& = \log \det(\mathbf{I}_d - 4\mathbf{A}) - \frac{1}{2} \log \det(\mathbf{I}_d - 8\mathbf{A}) - L^{-1} \sum_{i=1}^L \|\mathbf{x}^{(i)}\|^2 - L^{-1} \sum_{j=1}^L \|\mathbf{y}^{(j)}\|^2 \\
& \quad + \sum_{l=1}^d (1 + (1 - 8\mathbf{A}_{\pi(\mathbf{A})_l, \pi(\mathbf{A})_l})^{-1}) \mathbf{\Lambda}_{l,l}^{(3)} \tag{51}
\end{aligned}$$

639 where we use  $\mathbf{E}$ 's definition (35). Let  $\pi^{-1}(\mathbf{A}) \in \mathbb{N}^d$  denote a permutation inverse to  $\pi(\mathbf{A})$ . By  
640 rearranging terms in the sum, we have:

$$\sum_{l=1}^d (1 + (1 - 8\mathbf{A}_{\pi(\mathbf{A})_l, \pi(\mathbf{A})_l})^{-1}) \mathbf{\Lambda}_{l,l}^{(3)} = \sum_{l=1}^d (1 + (1 - 8\mathbf{A}_{l,l})^{-1}) \mathbf{\Lambda}_{\pi^{-1}(\mathbf{A})_l, \pi^{-1}(\mathbf{A})_l}^{(3)}.$$

641 Therefore, we have:

$$\begin{aligned}
\mathcal{G}(\mathbf{A}) & = \log \det(\mathbf{I}_d - 4\mathbf{A}) - \frac{1}{2} \log \det(\mathbf{I}_d - 8\mathbf{A}) - L^{-1} \sum_{i=1}^L \|\mathbf{x}^{(i)}\|^2 - L^{-1} \sum_{j=1}^L \|\mathbf{y}^{(j)}\|^2 \\
& \quad + \sum_{l=1}^d (1 + (1 - 8\mathbf{A}_{l,l})^{-1}) \mathbf{\Lambda}_{\pi^{-1}(\mathbf{A})_l, \pi^{-1}(\mathbf{A})_l}^{(3)}. \tag{52}
\end{aligned}$$

642 Define a new function  $\mathcal{G}(\hat{\mathbf{A}}, \mathbf{A})$ , where  $\hat{\mathbf{A}} \in \mathbb{D}_d$  satisfies  $8\hat{\mathbf{A}} \prec \mathbf{I}_d$ , as follows:

$$\mathcal{G}(\hat{\mathbf{A}}, \mathbf{A}) = \log \det(\mathbf{I}_d - 4\hat{\mathbf{A}}) - \frac{1}{2} \log \det(\mathbf{I}_d - 8\hat{\mathbf{A}}) + \sum_{l=1}^d (1 - 8\hat{\mathbf{A}}_{l,l})^{-1} \Lambda_{\pi^{-1}(\mathbf{A})_l, \pi^{-1}(\mathbf{A})_l}^{(3)}.$$

643 By the definition of  $\mathcal{G}(\hat{\mathbf{A}}, \mathbf{A})$ , we have:

$$\mathcal{G}(\mathbf{A}) = \mathcal{G}(\mathbf{A}, \mathbf{A}) - L^{-1} \sum_{i=1}^L \|\mathbf{x}^{(i)}\|^2 - L^{-1} \sum_{j=1}^L \|\mathbf{y}^{(j)}\|^2 + \sum_{l=1}^d \Lambda_{\pi^{-1}(\mathbf{A})_l, \pi^{-1}(\mathbf{A})_l}^{(3)}.$$

644 Hence, it holds:

$$\mathcal{G}(\mathbf{A}) \geq \inf_{\hat{\mathbf{A}} \in \mathbb{D}_d, 8\hat{\mathbf{A}} \prec \mathbf{I}_d} \mathcal{G}(\hat{\mathbf{A}}, \mathbf{A}) - L^{-1} \sum_{i=1}^L \|\mathbf{x}^{(i)}\|^2 - L^{-1} \sum_{j=1}^L \|\mathbf{y}^{(j)}\|^2 + \sum_{l=1}^d \Lambda_{\pi^{-1}(\mathbf{A})_l, \pi^{-1}(\mathbf{A})_l}^{(3)}. \quad (53)$$

645 Next, we show that there is a closed-form expression for the solution of  $\inf_{\hat{\mathbf{A}} \in \mathbb{D}_d, 8\hat{\mathbf{A}} \prec \mathbf{I}_d} \mathcal{G}(\hat{\mathbf{A}}, \mathbf{A})$ .

646 Since  $\hat{\mathbf{A}} \in \mathbb{D}_d$ , we have:  $\log \det(\mathbf{I}_d - 4\hat{\mathbf{A}}) = \sum_{l=1}^d \log(1 - 4\hat{\mathbf{A}}_{l,l})$ ,  $\log \det(\mathbf{I}_d - 8\hat{\mathbf{A}}) =$   
 647  $\sum_{l=1}^d \log(1 - 8\hat{\mathbf{A}}_{l,l})$ . We further have:

$$\mathcal{G}(\hat{\mathbf{A}}, \mathbf{A}) = \sum_{l=1}^d \left( \log(1 - 4\hat{\mathbf{A}}_{l,l}) - \frac{1}{2} \log(1 - 8\hat{\mathbf{A}}_{l,l}) + (1 - 8\hat{\mathbf{A}}_{l,l})^{-1} \Lambda_{\pi^{-1}(\mathbf{A})_l, \pi^{-1}(\mathbf{A})_l}^{(3)} \right). \quad (54)$$

648 From (54), we see that minimization  $\inf_{\hat{\mathbf{A}} \in \mathbb{D}_d, 8\hat{\mathbf{A}} \prec \mathbf{I}_d} \mathcal{G}(\hat{\mathbf{A}}, \mathbf{A})$  reduces to  $d$  independent minimization

649 problems with respect to  $\hat{\mathbf{A}}_{l,l}$  such that  $8\hat{\mathbf{A}}_{l,l} < 1$ .  $l$ 'th problem,  $1 \leq l \leq d$ , is solved using Lemma

650 A.1 where we set  $\phi = \Lambda_{\pi^{-1}(\mathbf{A})_l, \pi^{-1}(\mathbf{A})_l}^{(3)}$ . Let  $\mathbf{A}^{**} \in \mathbb{D}_d$  denote the corresponding solution. Then,

651 for all  $1 \leq l \leq d$ , we have:

$$\mathbf{A}_{l,l}^{**} = \frac{1}{16} \left( 1 - 2\Lambda_{\pi^{-1}(\mathbf{A})_l, \pi^{-1}(\mathbf{A})_l}^{(3)} - \sqrt{\left( 2\Lambda_{\pi^{-1}(\mathbf{A})_l, \pi^{-1}(\mathbf{A})_l}^{(3)} + 1 \right)^2 + 8\Lambda_{\pi^{-1}(\mathbf{A})_l, \pi^{-1}(\mathbf{A})_l}^{(3)}} \right). \quad (55)$$

652 From (53) it follows that

$$\begin{aligned} \mathcal{G}(\mathbf{A}) &\geq \mathcal{G}(\mathbf{A}^{**}, \mathbf{A}) - L^{-1} \sum_{i=1}^L \|\mathbf{x}^{(i)}\|^2 - L^{-1} \sum_{j=1}^L \|\mathbf{y}^{(j)}\|^2 + \sum_{l=1}^d \Lambda_{\pi^{-1}(\mathbf{A})_l, \pi^{-1}(\mathbf{A})_l}^{(3)} \\ &= \log \det(\mathbf{I}_d - 4\mathbf{A}^{**}) - \frac{1}{2} \log \det(\mathbf{I}_d - 8\mathbf{A}^{**}) - L^{-1} \sum_{i=1}^L \|\mathbf{x}^{(i)}\|^2 - L^{-1} \sum_{j=1}^L \|\mathbf{y}^{(j)}\|^2 \\ &\quad + \sum_{l=1}^d (1 + (1 - 8\mathbf{A}_{l,l}^{**})^{-1}) \Lambda_{\pi^{-1}(\mathbf{A})_l, \pi^{-1}(\mathbf{A})_l}^{(3)}. \end{aligned} \quad (56)$$

653 Denote  $\mathbf{E}^{**} = -\frac{1}{2}\mathbf{I}_d - \frac{1}{2}(\mathbf{I}_d - 8\mathbf{A}^{**})^{-1}$ . Then we have:

$$\begin{aligned} \sum_{l=1}^d (1 + (1 - 8\mathbf{A}_{l,l}^{**})^{-1}) \Lambda_{\pi^{-1}(\mathbf{A})_l, \pi^{-1}(\mathbf{A})_l}^{(3)} &= -2 \text{Trace} \left( \mathbf{E}^{**} \Pi(\mathbf{A})^{-1} \Lambda^{(3)} (\Pi(\mathbf{A})^{-1})^\top \right) \\ &\leq -2 \sum_{l=1}^d \mathbf{E}_{\pi(\mathbf{A}^{**})_l, \pi(\mathbf{A}^{**})_l}^{**} \Lambda_{l,l}^{(3)} \end{aligned} \quad (57)$$

654 where the second transition follows from Lemma A.4 and the fact that  $\pi(\mathbf{A}^{**})$  sorts diagonal

655 entries of  $\mathbf{A}^{**}$  in a non-descending order, hence its sorts diagonal entries of  $\mathbf{E}^{**}$  in a non-ascending

656 order (recall the definition of  $\pi(\mathbf{A}^{**})$  and  $\mathbf{E}^{**}$ ). Denote  $\mathbf{E}^* = \Pi(\mathbf{A}^{**}) \mathbf{E}^{**} \Pi(\mathbf{A}^{**})^\top$ . Then

657  $\mathbf{E}_{\pi(\mathbf{A}^{**})_l, \pi(\mathbf{A}^{**})_l}^{**} = \mathbf{E}_{l,l}^*$  for all  $1 \leq l \leq d$  and

$$\sum_{l=1}^d \mathbf{E}_{\pi(\mathbf{A}^{**})_l, \pi(\mathbf{A}^{**})_l}^{**} \Lambda_{l,l}^{(3)} = \sum_{l=1}^d \mathbf{E}_{l,l}^* \Lambda_{l,l}^{(3)}. \quad (58)$$

Further, we have:

$$\begin{aligned}\mathbf{E}^* &= \Pi(\mathbf{A}^{**}) \left( -\frac{1}{2}\mathbf{I}_d - \frac{1}{2}(\mathbf{I}_d - 8\mathbf{A}^{**})^{-1} \right) \Pi(\mathbf{A}^{**})^\top \\ &= -\frac{1}{2}\mathbf{I}_d - \frac{1}{2}(\mathbf{I}_d - 8\Pi(\mathbf{A}^{**})\mathbf{A}^{**}\Pi(\mathbf{A}^{**})^\top)^{-1} \\ &= -\frac{1}{2}\mathbf{I}_d - \frac{1}{2}(\mathbf{I}_d - 8\mathbf{A}^*)^{-1}\end{aligned}$$

where we denote  $\mathbf{A}^* = \Pi(\mathbf{A}^{**})\mathbf{A}^{**}\Pi(\mathbf{A}^{**})^\top$ , i.e.  $\mathbf{A}_{l,l}^* = \mathbf{A}_{\pi(\mathbf{A}^{**})_l, \pi(\mathbf{A}^{**})_l}^{**}$  for all  $1 \leq l \leq d$ .  
Given the definition of  $\mathbf{A}^{**}$  (55), for all  $1 \leq l \leq d$  we have:

$$\mathbf{A}_{l,l}^* = \frac{1}{16} \left( 1 - 2\Lambda_{l,l}^{(3)} - \sqrt{\left(2\Lambda_{l,l}^{(3)} + 1\right)^2 + 8\Lambda_{l,l}^{(3)}} \right). \quad (59)$$

That is,  $\mathbf{A}^*$  is independent of  $\mathbf{A}$ . Based on (59), we see that smaller values of  $\Lambda_{l,l}^{(3)}$  result in bigger values of  $\mathbf{A}_{l,l}^*$ . Since  $\Lambda_{1,1}^{(3)}, \dots, \Lambda_{d,d}^{(3)}$  are ordered in a non-ascending order, we deduce that  $\mathbf{A}_{1,1}^*, \dots, \mathbf{A}_{d,d}^*$  are ordered in a non-descending order. By the definition of  $\pi(\mathbf{A}^*)$ , we then have  $\mathbf{A}_{l,l}^* = \mathbf{A}_{\pi(\mathbf{A}^*)_l, \pi(\mathbf{A}^*)_l}^*$  for all  $1 \leq l \leq d$ . Therefore,

$$\sum_{l=1}^d \mathbf{E}_{l,l}^* \Lambda_{l,l}^{(3)} = -\frac{1}{2} \sum_{l=1}^d (1 + (1 - 8\mathbf{A}_{l,l}^*)^{-1}) \Lambda_{l,l}^{(3)} = -\frac{1}{2} \sum_{l=1}^d (1 + (1 - 8\mathbf{A}_{\pi(\mathbf{A}^*)_l, \pi(\mathbf{A}^*)_l}^*)^{-1}) \Lambda_{l,l}^{(3)}.$$

Combining this with (58), (57), we can continue the chain of inequalities (56):

$$\begin{aligned}\mathcal{G}(\mathbf{A}) &\geq \log \det(\mathbf{I}_d - 4\mathbf{A}^{**}) - \frac{1}{2} \log \det(\mathbf{I}_d - 8\mathbf{A}^{**}) - L^{-1} \sum_{i=1}^L \|\mathbf{x}^{(i)}\|^2 - L^{-1} \sum_{j=1}^L \|\mathbf{y}^{(j)}\|^2 \\ &\quad + \sum_{l=1}^d \left( 1 + (1 - 8\mathbf{A}_{\pi(\mathbf{A}^*)_l, \pi(\mathbf{A}^*)_l}^*)^{-1} \right) \Lambda_{l,l}^{(3)} \\ &= \log \det(\mathbf{I}_d - 4\mathbf{A}^*) - \frac{1}{2} \log \det(\mathbf{I}_d - 8\mathbf{A}^*) - L^{-1} \sum_{i=1}^L \|\mathbf{x}^{(i)}\|^2 - L^{-1} \sum_{j=1}^L \|\mathbf{y}^{(j)}\|^2 \\ &\quad + \sum_{l=1}^d \left( 1 + (1 - 8\mathbf{A}_{\pi(\mathbf{A}^*)_l, \pi(\mathbf{A}^*)_l}^*)^{-1} \right) \Lambda_{l,l}^{(3)} = \mathcal{G}(\mathbf{A}^*)\end{aligned} \quad (60)$$

where in the second transition we use the fact that

$$\det(\mathbf{I}_d - 4\mathbf{A}^*) = \det(\Pi(\mathbf{A}^{**})(\mathbf{I}_d - 4\mathbf{A}^{**})\Pi(\mathbf{A}^{**})^\top) = \det(\mathbf{I}_d - 4\mathbf{A}^{**})$$

and, similarly,  $\det(\mathbf{I}_d - 8\mathbf{A}^*) = \det(\mathbf{I}_d - 8\mathbf{A}^{**})$ . In the third transition, we use definition of  $\mathcal{G}(\cdot)$  (51). Note that (60) holds for all  $\mathbf{A} \in \mathbb{D}_d$  such that  $8\mathbf{A} \prec \mathbf{I}_d$  and also  $8\mathbf{A}^* \prec \mathbf{I}_d$  since  $8\mathbf{A}^{**} \prec \mathbf{I}_d$ . We conclude that, when  $\mathbf{B}, \mathbf{C}, \mathbf{D}$  are chosen optimally with a given  $\mathbf{A}$ , the minimum of  $\bar{\mathcal{L}}(\theta_{\text{SDE}}; \mathcal{X}, \mathcal{Y}, \mathcal{T}_{\text{SDE}})$  is reached when  $\mathbf{A} = \mathbf{A}^*$ . As we have already deduced, diagonal entries of  $\mathbf{A} = \mathbf{A}^*$  are sorted in the non-descending order. Hence, using Lemma A.4's notation, diagonal entries of  $\mathbf{E}$  are already sorted in a non-ascending sorting order and  $\pi = (1, \dots, d)$ ,  $\Pi = \mathbf{I}_d$  satisfy requirements of the Lemma. Hence, with  $\mathbf{A} = \mathbf{A}^*$ , the optimal  $\mathbf{B}$  has a form  $(\mathbf{I}_d - 4\mathbf{A})^{1/2} \mathbf{Q}^*$  where  $\mathbf{Q}^* = \mathbf{I}_d(\mathbf{Q}^{(3)})^\top = (\mathbf{Q}^{(3)})^\top$ . Optimal  $\mathbf{C}$  and  $\mathbf{D}$  are further determined by (33). (11) follows from (60) and the fact that, as discussed above, we can replace  $\pi(\mathbf{A}^*)_l$  with  $l$  in (60),  $1 \leq l \leq d$ .  $\square$

## B Additional experimental details

### B.1 Compute resources and implementation

We use NumPy [24] in Google Colaboratory the variance comparison and kernel classification experiment. For the Transformer setups, we use TPU cluster and JAX [7] library. All tested Transformer variants were trained and tested on a TPU pods containing 4 TPU v3 chips with JAX and on GPUs (V100).

## 682 B.2 Variance comparison

683 We repeat the setup of [30] closely: we draw 5 pairs of sets  $\{\mathbf{x}^{(i)}\}_{1 \leq i \leq L}$ ,  $\{\mathbf{y}^{(j)}\}_{1 \leq j \leq L}$ ,  $L = 1024$ .  
 684 On each pair, we compute the relative variance for all pairs of points and for all indicated RF methods.  
 685 Further, the shifted log-variance is optimized separately on each pair of sets for GERF, ADERF and  
 686 SDERF.

687 We take  $M = 1$  since  $M$ 's value is not important in this experiment: bigger  $M$  would just shift the  
 688 curves below. The reported curves are means over all pairs of points and over all 5 sets.

## 689 B.3 Kernel classification

690 As in [30], we obtain training, validation and test splits by shuffling the raw dataset and taking 90%,  
 691 5%, 5% objects respectively. The splits are fixed for all RF methods. We tune  $\sigma$  on a logarithmic grid  
 692 of 10 values on  $[10^{-2}, 10^2]$ . For each  $\sigma$  and each RF type, we try 50 seeds for drawing RFs during  
 693 validation and testing. Testing is performed for the best  $\sigma$  only. Figure 3 reports averages over 50  
 694 seeds. We use orthogonal  $\omega$ 's for all types of RFs as described in [30], since orthogonal random  
 695 features work better in practice [15, 30].

## 696 B.4 DERFs for long-sequence Transformers

### 697 B.4.1 Speech modelling

698 Our Conformer-Transducer variant was characterized by: **20** conformer layers, model\_dim = **512**,  
 699 relative position embedding dimensionality rped = **512** and  $h = 8$  heads. We used batch size  
 700 bs = **2048** and trained with the adam optimizer on TPUs. For the regular Conformer-Transducer  
 701 training, we run ablation studies over different number of random features:  $m = 8, 32, 128$ . In the  
 702 NST setting, we run experiments with  $m = 8$ . We reported commonly used metric: normalized word  
 703 error rate (NWER).

### 704 B.4.2 Natural language processing

705 We pretrained BERT model on two publicly available datasets (see: Table 3). Following the original  
 706 BERT training, we mask 15% of tokens in these two datasets, and train to predict the mask. All  
 707 methods were warm started from exactly the same pre-trained checkpoint after 1M iteration of BERT  
 708 pretraining. We used the exact same hyperparameter-setup for all the baselines (FAVOR++[30],  
 709 FAVOR+ [15], ELU [25], ReLU [15]) and FAVOR++. The hyperparameters for pretraining are shown  
 710 in Table 2. We finetuned on GLUE task, warm-starting with the weights of the pretrained model. The  
 711 setup is analogous to the one from the original BERT paper.

Table 2: Hyperparameters for the base models for pre-training for all methods

| Parameter              | Value              |
|------------------------|--------------------|
| # of heads             | 12                 |
| # of hidden layers     | 12                 |
| Hidden layer size      | 768                |
| # of tokens            | 512                |
| Batch size             | 256                |
| M                      | 256                |
| Pretrain Steps         | $1M$               |
| Loss                   | MLM                |
| Activation layer       | gelu               |
| Dropout prob           | 0.1                |
| Attention dropout prob | 0.1                |
| Optimizer              | Adam               |
| Learning rate          | $10^{-4}$          |
| Compute resources      | $8 \times 8$ TPUv3 |

Table 3: Dataset used for pre training.

| Dataset    | # tokens | Avg. doc len. |
|------------|----------|---------------|
| Books [52] | 1.0B     | 37K           |
| Wikipedia  | 3.1B     | 592           |
